# Supplementary material for: SemFunSim: A New Method for Measuring Disease Similarity by Integrating Semantic and Gene Functional Association
Source: PLoS One. 2014 Jun 16;9(6):e99415. doi: 10.1371/journal.pone.0099415 (PMC4059643; doi:10.1371/journal.pone.0099415)
Supplement: Dataset S6 — FDRs for the similarity scores. The FDRs for pairs of diseases with the similarity score above 0.00111 are listed. (XLSX) [file pone.0099415.s009.xlsx]

## Sheet: FDRs
DOID_1	Disease_Name_1	DOID_2	Disease_Name_2	Similarity	FDR
DOID:9598	fasciitis	DOID:9600	plantar fasciitis	1	0
DOID:3141	mucinoses	DOID:11634	myxedema	1	0
DOID:864	phlebitis	DOID:3875	thrombophlebitis	1	0
DOID:12169	carpal tunnel syndrome	DOID:573	nerve compression syndrome	1	0
DOID:12577	urethral obstruction	DOID:13948	bladder neck obstruction	1	0
DOID:0050596	taeniasis	DOID:10079	cysticercosis	1	0
DOID:9849	Meniere's disease	DOID:9848	endolymphatic hydrops	1	0
DOID:9810	polyarteritis nodosa	DOID:13378	Kawasaki disease	1	0
DOID:10652	Alzheimer's disease	DOID:680	tauopathy	0.997097	0.000111111
DOID:5093	thoracic cancer	DOID:1612	breast cancer	0.996043	0.0001
DOID:9741	biliary tract disease	DOID:4138	bile duct disease	0.987821	9.09091e-05
DOID:9351	diabetes mellitus	DOID:4194	glucose metabolism disease	0.983595	8.33333e-05
DOID:2841	asthma	DOID:1176	bronchial disease	0.977692	0.000153846
DOID:2349	arteriosclerosis	DOID:2868	arterial occlusive disease	0.977545	0.000142857
DOID:3527	cerebral arterial disease	DOID:13089	intracranial arterial disease	0.977177	0.000133333
DOID:2377	multiple sclerosis	DOID:3213	demyelinating disease	0.975922	0.000125
DOID:1307	dementia	DOID:10652	Alzheimer's disease	0.968021	0.000117647
DOID:1936	atherosclerosis	DOID:2349	arteriosclerosis	0.958656	0.000111111
DOID:182	calcinosis	DOID:10575	calcium metabolism disease	0.941595	0.000157895
DOID:9296	cleft lip	DOID:674	cleft palate	0.939198	0.00015
DOID:1936	atherosclerosis	DOID:2868	arterial occlusive disease	0.937098	0.000142857
DOID:14330	Parkinson's disease	DOID:679	basal ganglia disease	0.920862	0.000136364
DOID:2170	vaginitis	DOID:121	vaginal disease	0.918959	0.000130435
DOID:2921	glomerulonephritis	DOID:10952	nephritis	0.909812	0.000125
DOID:848	arthritis	DOID:3342	bone inflammation disease	0.895321	0.00012
DOID:450	myotonic disease	DOID:11722	myotonic dystrophy	0.869982	0.000192308
DOID:14557	primary pulmonary hypertension	DOID:8515	cor pulmonale	0.865801	0.000185185
DOID:1227	neutropenia	DOID:12987	agranulocytosis	0.86337	0.000178571
DOID:0000000	gallbladder disease	DOID:10211	cholelithiasis	0.856985	0.000206897
DOID:10113	trypanosomiasis	DOID:12140	Chagas disease	0.854669	0.0002
DOID:2871	endometrial carcinoma	DOID:363	uterine cancer	0.852395	0.000193548
DOID:1407	anterior uveitis	DOID:12030	panuveitis	0.852095	0.0001875
DOID:13543	hyperparathyroidism	DOID:12466	secondary hyperparathyroidism	0.840899	0.000181818
DOID:2320	obstructive lung disease	DOID:850	lung disease	0.833134	0.000176471
DOID:8670	eating disorder	DOID:12129	bulimia nervosa	0.833031	0.000171429
DOID:2218	blood platelet disease	DOID:1588	thrombocytopenia	0.82796	0.000222222
DOID:1936	atherosclerosis	DOID:3363	coronary arteriosclerosis	0.821777	0.000216216
DOID:9446	cholangitis	DOID:14268	sclerosing cholangitis	0.812939	0.000210526
DOID:2773	contact dermatitis	DOID:3042	allergic contact dermatitis	0.81246	0.000230769
DOID:2316	brain ischemia	DOID:326	ischemia	0.801745	0.000225
DOID:2825	nose disease	DOID:4483	rhinitis	0.791619	0.000219512
DOID:7693	abdominal aortic aneurysm	DOID:3627	aortic aneurysm	0.787337	0.000214286
DOID:2349	arteriosclerosis	DOID:3363	coronary arteriosclerosis	0.787018	0.000209302
DOID:12365	malaria	DOID:2789	parasitic protozoa infectious disease	0.775496	0.000204545
DOID:4535	hypotrichosis	DOID:987	alopecia	0.771494	0.0002
DOID:2868	arterial occlusive disease	DOID:3363	coronary arteriosclerosis	0.769201	0.000195652
DOID:1091	tooth disease	DOID:3388	periodontal disease	0.768699	0.000191489
DOID:824	periodontitis	DOID:3388	periodontal disease	0.765914	0.000208333
DOID:6713	cerebrovascular disease	DOID:3455	cerebrovascular accident	0.765801	0.000204082
DOID:8692	myeloid leukemia	DOID:9119	acute myeloid leukemia	0.76527	0.0002
DOID:1557	hypersensitivity reaction type III disease	DOID:11123	Henoch-Schoenlein purpura	0.763978	0.000196078
DOID:1240	leukemia	DOID:2531	hematologic cancer	0.758068	0.000192308
DOID:2485	phosphorus metabolism disease	DOID:0050459	hyperphosphatemia	0.757576	0.000188679
DOID:848	arthritis	DOID:7148	rheumatoid arthritis	0.746749	0.000203704
DOID:0050589	inflammatory bowel disease	DOID:5295	intestinal disease	0.742914	0.000218182
DOID:3393	coronary heart disease	DOID:3363	coronary arteriosclerosis	0.741106	0.000214286
DOID:2218	blood platelet disease	DOID:2213	hemorrhagic disease	0.73971	0.000210526
DOID:1184	nephrotic syndrome	DOID:2527	nephrosis	0.737642	0.000206897
DOID:615	leukopenia	DOID:12987	agranulocytosis	0.732399	0.000220339
DOID:9538	multiple myeloma	DOID:4960	bone marrow cancer	0.72706	0.000233333
DOID:3133	acute porphyria	DOID:13268	porphyria	0.718703	0.000229508
DOID:1247	blood coagulation disease	DOID:2452	thrombophilia	0.711712	0.000225806
DOID:2018	hyperinsulinism	DOID:26	pancreas disease	0.71115	0.000222222
DOID:2361	macrocytic anemia	DOID:13382	megaloblastic anemia	0.711111	0.00021875
DOID:4440	seminoma	DOID:3304	germinoma	0.704029	0.000215385
DOID:1089	tethered spinal cord syndrome	DOID:319	spinal cord disease	0.691565	0.000227273
DOID:1074	kidney failure	DOID:557	kidney disease	0.691123	0.000223881
DOID:3328	temporal lobe epilepsy	DOID:2234	focal epilepsy	0.688225	0.000220588
DOID:2044	drug-induced hepatitis	DOID:2237	hepatitis	0.68731	0.000217391
DOID:0000000	gallbladder disease	DOID:11151	cholecystolithiasis	0.674796	0.000228571
DOID:421	hair disease	DOID:4535	hypotrichosis	0.671644	0.000225352
DOID:2394	ovarian cancer	DOID:120	female reproductive organ cancer	0.666475	0.000263889
DOID:3342	bone inflammation disease	DOID:7148	rheumatoid arthritis	0.666319	0.000260274
DOID:13636	Fanconi's anemia	DOID:1342	congenital hypoplastic anemia	0.656448	0.00027027
DOID:9074	systemic lupus erythematosus	DOID:65	connective tissue disease	0.64868	0.00028
DOID:365	bladder disease	DOID:1679	cystitis	0.647149	0.000276316
DOID:9663	aphthous stomatitis	DOID:9637	stomatitis	0.645085	0.000272727
DOID:1067	open-angle glaucoma	DOID:1686	glaucoma	0.643678	0.000269231
DOID:9370	exophthalmos	DOID:930	orbital disease	0.642857	0.000265823
DOID:4247	coronary restenosis	DOID:4248	coronary stenosis	0.64164	0.0002625
DOID:1289	neurodegenerative disease	DOID:331	central nervous system disease	0.636063	0.000283951
DOID:10241	thalassemia	DOID:12241	beta thalassemia	0.631272	0.000292683
DOID:615	leukopenia	DOID:1227	neutropenia	0.63026	0.000289157
DOID:10211	cholelithiasis	DOID:11151	cholecystolithiasis	0.626942	0.000285714
DOID:1811	reflex sympathetic dystrophy	DOID:3223	complex regional pain syndrome	0.623133	0.000294118
DOID:418	systemic scleroderma	DOID:854	collagen disease	0.614583	0.000290698
DOID:2213	hemorrhagic disease	DOID:1588	thrombocytopenia	0.610127	0.000287356
DOID:8466	retinal degeneration	DOID:5679	retinal disease	0.603309	0.000284091
DOID:4029	gastritis	DOID:76	stomach disease	0.594455	0.000292135
DOID:12336	male infertility	DOID:48	male reproductive system disease	0.591893	0.0003
DOID:3394	ischemic heart disease	DOID:5844	myocardial infarction	0.588882	0.000296703
DOID:409	liver disease	DOID:5082	liver cirrhosis	0.587104	0.000293478
DOID:1091	tooth disease	DOID:824	periodontitis	0.584254	0.000301075
DOID:3324	mood disorder	DOID:3312	bipolar disorder	0.580038	0.000308511
DOID:0050589	inflammatory bowel disease	DOID:8778	Crohn's disease	0.57828	0.000305263
DOID:9500	leukocyte disease	DOID:615	leukopenia	0.577387	0.000302083
DOID:9540	vascular skin disease	DOID:9810	polyarteritis nodosa	0.569507	0.000316327
DOID:9540	vascular skin disease	DOID:13378	Kawasaki disease	0.569507	0.000316327
DOID:7998	hyperthyroidism	DOID:50	thyroid gland disease	0.568315	0.000313131
DOID:2841	asthma	DOID:2320	obstructive lung disease	0.561433	0.00033
DOID:4195	hyperglycemia	DOID:10603	glucose intolerance	0.549906	0.000326733
DOID:3620	central nervous system cancer	DOID:3093	nervous system cancer	0.540448	0.000323529
DOID:4483	rhinitis	DOID:4481	allergic rhinitis	0.536241	0.000330097
DOID:4138	bile duct disease	DOID:13580	cholestasis	0.528884	0.000336538
DOID:9741	biliary tract disease	DOID:13580	cholestasis	0.521987	0.000361905
DOID:0080001	bone disease	DOID:3342	bone inflammation disease	0.518948	0.000377358
DOID:421	hair disease	DOID:987	alopecia	0.512293	0.000392523
DOID:9976	heroin dependence	DOID:2559	opiate dependence	0.50419	0.000435185
DOID:2921	glomerulonephritis	DOID:2986	IgA glomerulonephritis	0.500525	0.000440367
DOID:635	acquired immunodeficiency syndrome	DOID:526	Human immunodeficiency virus infectious disease	0.498808	0.000481818
DOID:680	tauopathy	DOID:1289	neurodegenerative disease	0.493382	0.000495495
DOID:10652	Alzheimer's disease	DOID:1289	neurodegenerative disease	0.491843	0.000491071
DOID:1529	penile disease	DOID:1875	impotence	0.491156	0.000495575
DOID:9452	fatty liver disease	DOID:9455	lipid storage disease	0.490849	0.000491228
DOID:3627	aortic aneurysm	DOID:2403	aneurysm disease	0.485825	0.000495652
DOID:178	vascular disease	DOID:10763	hypertension	0.475093	0.000534483
DOID:850	lung disease	DOID:1176	bronchial disease	0.474966	0.000529915
DOID:2841	asthma	DOID:850	lung disease	0.46399	0.000550847
DOID:0080001	bone disease	DOID:848	arthritis	0.460703	0.000563025
DOID:399	tuberculosis	DOID:2957	pulmonary tuberculosis	0.459123	0.000558333
DOID:3133	acute porphyria	DOID:3132	porphyria cutanea tarda	0.457643	0.000570248
DOID:9065	leishmaniasis	DOID:9111	cutaneous leishmaniasis	0.456909	0.000565574
DOID:2113	coccidiosis	DOID:9965	toxoplasmosis	0.456765	0.000560976
DOID:865	vasculitis	DOID:13241	Behcet's disease	0.45505	0.000572581
DOID:0050589	inflammatory bowel disease	DOID:8577	ulcerative colitis	0.454606	0.000576
DOID:5679	retinal disease	DOID:5614	eye disease	0.452815	0.000603175
DOID:2986	IgA glomerulonephritis	DOID:10952	nephritis	0.450771	0.000606299
DOID:8692	myeloid leukemia	DOID:1240	leukemia	0.441527	0.00071875
DOID:9065	leishmaniasis	DOID:9146	visceral leishmaniasis	0.438597	0.000728682
DOID:3393	coronary heart disease	DOID:114	heart disease	0.438424	0.000723077
DOID:2320	obstructive lung disease	DOID:1176	bronchial disease	0.431719	0.000793893
DOID:5295	intestinal disease	DOID:8778	Crohn's disease	0.423301	0.000856061
DOID:2825	nose disease	DOID:4481	allergic rhinitis	0.419137	0.000894737
DOID:1091	tooth disease	DOID:403	mouth disease	0.41412	0.000925373
DOID:9500	leukocyte disease	DOID:12987	agranulocytosis	0.413154	0.000918519
DOID:2320	obstructive lung disease	DOID:3083	chronic obstructive pulmonary disease	0.411788	0.000948529
DOID:12336	male infertility	DOID:14228	oligospermia	0.403041	0.00107299
DOID:331	central nervous system disease	DOID:936	brain disease	0.394896	0.00123188
DOID:3426	vestibular disease	DOID:9849	Meniere's disease	0.394781	0.00122143
DOID:3426	vestibular disease	DOID:9848	endolymphatic hydrops	0.394781	0.00122143
DOID:3576	sagittal sinus thrombosis	DOID:3572	intracranial sinus thrombosis	0.379177	0.00151773
DOID:7693	abdominal aortic aneurysm	DOID:2403	aneurysm disease	0.377145	0.0015493
DOID:12030	panuveitis	DOID:13141	uveitis	0.374854	0.00161538
DOID:13001	carotid stenosis	DOID:3407	carotid artery disease	0.371368	0.00165278
DOID:12449	aplastic anemia	DOID:1342	congenital hypoplastic anemia	0.367349	0.00170345
DOID:890	mitochondrial encephalomyopathy	DOID:699	mitochondrial myopathy	0.367136	0.00169863
DOID:1724	duodenal ulcer	DOID:750	peptic ulcer	0.366296	0.00168707
DOID:14067	Plasmodium falciparum malaria	DOID:12365	malaria	0.361781	0.00180405
DOID:8541	Sezary's disease	DOID:0060061	cutaneous T cell lymphoma	0.36162	0.00179195
DOID:2723	dermatitis	DOID:37	skin disease	0.356913	0.00190667
DOID:660	adrenal cortex cancer	DOID:3953	adrenal gland cancer	0.355527	0.00192715
DOID:13832	patent ductus arteriosus	DOID:1682	congenital heart defect	0.353844	0.00195395
DOID:9500	leukocyte disease	DOID:1227	neutropenia	0.352175	0.00197386
DOID:75	lymphatic system disease	DOID:13378	Kawasaki disease	0.352052	0.00196104
DOID:9206	Barrett's esophagus	DOID:6050	esophageal disease	0.346818	0.00214839
DOID:986	alopecia areata	DOID:987	alopecia	0.342251	0.00223718
DOID:11963	esophagitis	DOID:6050	esophageal disease	0.339853	0.00228662
DOID:850	lung disease	DOID:3083	chronic obstructive pulmonary disease	0.33938	0.00228481
DOID:9540	vascular skin disease	DOID:341	peripheral vascular disease	0.337111	0.00232704
DOID:0080001	bone disease	DOID:7148	rheumatoid arthritis	0.336367	0.00235
DOID:1080	filariasis	DOID:12211	filarial elephantiasis	0.335693	0.00235404
DOID:9965	toxoplasmosis	DOID:13336	congenital toxoplasmosis	0.333333	0.00241975
DOID:1240	leukemia	DOID:9119	acute myeloid leukemia	0.332004	0.00248466
DOID:5295	intestinal disease	DOID:8577	ulcerative colitis	0.331425	0.00247561
DOID:8692	myeloid leukemia	DOID:2531	hematologic cancer	0.329309	0.00249697
DOID:2030	anxiety disorder	DOID:4964	neurotic disorder	0.327008	0.00254819
DOID:2742	auditory system disease	DOID:10003	sensorineural hearing loss	0.32394	0.00263473
DOID:10808	gastric ulcer	DOID:750	peptic ulcer	0.31918	0.00279167
DOID:3363	coronary arteriosclerosis	DOID:114	heart disease	0.318963	0.00278107
DOID:3132	porphyria cutanea tarda	DOID:13268	porphyria	0.318803	0.00276471
DOID:229	female reproductive system disease	DOID:780	placenta disease	0.316823	0.00282456
DOID:890	mitochondrial encephalomyopathy	DOID:3687	MELAS syndrome	0.315568	0.00286047
DOID:1407	anterior uveitis	DOID:13141	uveitis	0.314974	0.00286127
DOID:403	mouth disease	DOID:3388	periodontal disease	0.313678	0.00287356
DOID:12449	aplastic anemia	DOID:4961	bone marrow disease	0.307965	0.00303429
DOID:3310	atopic dermatitis	DOID:2723	dermatitis	0.307959	0.00301705
DOID:3394	ischemic heart disease	DOID:114	heart disease	0.307742	0.00301695
DOID:417	hypersensitivity reaction type II disease	DOID:9074	systemic lupus erythematosus	0.307355	0.00302247
DOID:680	tauopathy	DOID:331	central nervous system disease	0.307117	0.00302235
DOID:1247	blood coagulation disease	DOID:74	hematopoietic system disease	0.306493	0.00302222
DOID:10652	Alzheimer's disease	DOID:331	central nervous system disease	0.306153	0.00301657
DOID:8432	polycythemia	DOID:8997	polycythemia vera	0.303194	0.0030989
DOID:3527	cerebral arterial disease	DOID:8725	vascular dementia	0.302974	0.00309836
DOID:2531	hematologic cancer	DOID:0060058	lymphoma	0.302869	0.00308696
DOID:229	female reproductive system disease	DOID:1100	ovarian disease	0.298895	0.00324324
DOID:2403	aneurysm disease	DOID:10941	intracranial aneurysm	0.298291	0.00326344
DOID:178	vascular disease	DOID:114	heart disease	0.29779	0.00325668
DOID:8725	vascular dementia	DOID:13089	intracranial arterial disease	0.29577	0.00331915
DOID:3394	ischemic heart disease	DOID:3393	coronary heart disease	0.293337	0.00337037
DOID:6713	cerebrovascular disease	DOID:936	brain disease	0.292961	0.00336842
DOID:2868	arterial occlusive disease	DOID:178	vascular disease	0.290771	0.00342932
DOID:106	pleural tuberculosis	DOID:9861	miliary tuberculosis	0.289704	0.00345313
DOID:2349	arteriosclerosis	DOID:178	vascular disease	0.28341	0.00381865
DOID:14067	Plasmodium falciparum malaria	DOID:2789	parasitic protozoa infectious disease	0.275583	0.00419072
DOID:1936	atherosclerosis	DOID:178	vascular disease	0.270199	0.00440513
DOID:660	adrenal cortex cancer	DOID:3948	adrenocortical carcinoma	0.269556	0.00440816
DOID:8466	retinal degeneration	DOID:5614	eye disease	0.262075	0.00477157
DOID:8577	ulcerative colitis	DOID:8778	Crohn's disease	0.259902	0.00488384
DOID:11394	adult respiratory distress syndrome	DOID:11162	respiratory failure	0.25751	0.0050201
DOID:2355	anemia	DOID:583	hemolytic anemia	0.257281	0.00501
DOID:4535	hypotrichosis	DOID:986	alopecia areata	0.256463	0.00506965
DOID:169	neuroendocrine tumor	DOID:171	neuroectodermal tumor	0.256378	0.00505941
DOID:4138	bile duct disease	DOID:9446	cholangitis	0.255884	0.00506404
DOID:0080001	bone disease	DOID:11476	osteoporosis	0.254914	0.00511765
DOID:8466	retinal degeneration	DOID:1686	glaucoma	0.252385	0.00526829
DOID:9741	biliary tract disease	DOID:9446	cholangitis	0.252337	0.00524757
DOID:2174	ocular cancer	DOID:6039	intraocular melanoma	0.248155	0.00557005
DOID:2531	hematologic cancer	DOID:9119	acute myeloid leukemia	0.246346	0.00566346
DOID:11713	diabetic angiopathy	DOID:341	peripheral vascular disease	0.243492	0.00583732
DOID:12157	aseptic meningitis	DOID:10310	viral meningitis	0.242548	0.00589524
DOID:2030	anxiety disorder	DOID:594	panic disorder	0.238616	0.00625118
DOID:4988	alcoholic pancreatitis	DOID:4989	pancreatitis	0.236113	0.00642925
DOID:3946	pituitary-dependent Cushing's disease	DOID:53	pituitary gland disease	0.234722	0.00656338
DOID:824	periodontitis	DOID:403	mouth disease	0.232766	0.00675234
DOID:1733	cryptosporidiosis	DOID:2113	coccidiosis	0.231746	0.00680465
DOID:10591	pre-eclampsia	DOID:10763	hypertension	0.231139	0.00683333
DOID:13636	Fanconi's anemia	DOID:12449	aplastic anemia	0.230563	0.00688479
DOID:48	male reproductive system disease	DOID:14228	oligospermia	0.228313	0.00708716
DOID:1388	Tangier disease	DOID:1387	hypolipoproteinemia	0.228177	0.00707763
DOID:9553	adrenal gland disease	DOID:13774	Addison's disease	0.226478	0.00718636
DOID:13564	aspergillosis	DOID:13166	allergic bronchopulmonary aspergillosis	0.225318	0.00726244
DOID:6713	cerebrovascular disease	DOID:178	vascular disease	0.224566	0.00736036
DOID:12554	hemolytic-uremic syndrome	DOID:583	hemolytic anemia	0.222123	0.0076009
DOID:1289	neurodegenerative disease	DOID:936	brain disease	0.221935	0.00759375
DOID:3394	ischemic heart disease	DOID:3363	coronary arteriosclerosis	0.221887	0.00756889
DOID:1240	leukemia	DOID:0060058	lymphoma	0.219321	0.00778761
DOID:3363	coronary arteriosclerosis	DOID:178	vascular disease	0.217972	0.00789868
DOID:936	brain disease	DOID:3455	cerebrovascular accident	0.216409	0.00803947
DOID:3093	nervous system cancer	DOID:769	neuroblastoma	0.214701	0.00817904
DOID:2355	anemia	DOID:12449	aplastic anemia	0.210587	0.00863913
DOID:883	parasitic helminthiasis infectious disease	DOID:0050597	intestinal schistosomiasis	0.209185	0.00877922
DOID:2452	thrombophilia	DOID:74	hematopoietic system disease	0.208892	0.00878448
DOID:417	hypersensitivity reaction type II disease	DOID:10608	celiac disease	0.207285	0.00895279
DOID:6590	spondylitis	DOID:1123	spondyloarthropathy	0.20349	0.00940171
DOID:1555	urticaria	DOID:9540	vascular skin disease	0.202529	0.0095234
DOID:4138	bile duct disease	DOID:14268	sclerosing cholangitis	0.200809	0.00966525
DOID:9741	biliary tract disease	DOID:14268	sclerosing cholangitis	0.197976	0.0100464
DOID:5199	ureteral obstruction	DOID:11111	hydronephrosis	0.194918	0.0104664
DOID:9970	obesity	DOID:14221	metabolic syndrome X	0.193474	0.0106987
DOID:440	neuromuscular disease	DOID:9884	muscular dystrophy	0.193003	0.0107375
DOID:8691	mycosis fungoides	DOID:0060061	cutaneous T cell lymphoma	0.191934	0.0108382
DOID:3393	coronary heart disease	DOID:5844	myocardial infarction	0.191656	0.0108388
DOID:13810	familial hypercholesterolemia	DOID:1168	familial hyperlipidemia	0.181793	0.0124979
DOID:341	peripheral vascular disease	DOID:9810	polyarteritis nodosa	0.180343	0.0126163
DOID:341	peripheral vascular disease	DOID:13378	Kawasaki disease	0.180343	0.0126163
DOID:2841	asthma	DOID:3083	chronic obstructive pulmonary disease	0.179201	0.0127276
DOID:9470	bacterial meningitis	DOID:9471	meningitis	0.173708	0.0137247
DOID:9146	visceral leishmaniasis	DOID:9111	cutaneous leishmaniasis	0.172965	0.0137863
DOID:8538	reticulosarcoma	DOID:2531	hematologic cancer	0.172361	0.0138313
DOID:854	collagen disease	DOID:65	connective tissue disease	0.171448	0.013968
DOID:114	heart disease	DOID:5844	myocardial infarction	0.171269	0.0139562
DOID:178	vascular disease	DOID:3455	cerebrovascular accident	0.166639	0.015
DOID:421	hair disease	DOID:986	alopecia areata	0.163066	0.0156996
DOID:12716	newborn respiratory distress syndrome	DOID:11162	respiratory failure	0.161702	0.0159567
DOID:1247	blood coagulation disease	DOID:2213	hemorrhagic disease	0.161166	0.0160431
DOID:1657	ventricular septal defect	DOID:1882	atrial heart septal defect	0.158833	0.0166211
DOID:1724	duodenal ulcer	DOID:10808	gastric ulcer	0.156602	0.017144
DOID:10112	sleeping sickness	DOID:10113	trypanosomiasis	0.155676	0.0173488
DOID:8466	retinal degeneration	DOID:1067	open-angle glaucoma	0.154912	0.0174826
DOID:12132	Wegener's granulomatosis	DOID:865	vasculitis	0.154302	0.01755
DOID:263	kidney cancer	DOID:11054	urinary bladder cancer	0.154133	0.0175172
DOID:1826	epilepsy syndrome	DOID:11832	visual epilepsy	0.152934	0.0177977
DOID:3393	coronary heart disease	DOID:178	vascular disease	0.152077	0.0179202
DOID:679	basal ganglia disease	DOID:936	brain disease	0.151972	0.0178864
DOID:2355	anemia	DOID:74	hematopoietic system disease	0.150912	0.0181245
DOID:1508	candidiasis	DOID:13564	aspergillosis	0.149772	0.0183496
DOID:363	uterine cancer	DOID:120	female reproductive organ cancer	0.148378	0.0186629
DOID:14069	cerebral malaria	DOID:12365	malaria	0.147123	0.0189701
DOID:5679	retinal disease	DOID:1686	glaucoma	0.146073	0.0191859
DOID:3363	coronary arteriosclerosis	DOID:5844	myocardial infarction	0.14556	0.0192519
DOID:2868	arterial occlusive disease	DOID:10763	hypertension	0.145257	0.0192583
DOID:114	heart disease	DOID:10763	hypertension	0.14524	0.0191875
DOID:409	liver disease	DOID:2237	hepatitis	0.144435	0.0193114
DOID:1289	neurodegenerative disease	DOID:3213	demyelinating disease	0.144001	0.0193978
DOID:1826	epilepsy syndrome	DOID:936	brain disease	0.142912	0.0196473
DOID:2349	arteriosclerosis	DOID:10763	hypertension	0.142217	0.019837
DOID:9383	iridocyclitis	DOID:1407	anterior uveitis	0.142004	0.0198159
DOID:3910	lung adenocarcinoma	DOID:3908	non-small cell lung carcinoma	0.140535	0.0201367
DOID:2377	multiple sclerosis	DOID:1289	neurodegenerative disease	0.139854	0.0202903
DOID:2113	coccidiosis	DOID:13336	congenital toxoplasmosis	0.138462	0.0206321
DOID:14330	Parkinson's disease	DOID:936	brain disease	0.138444	0.0205623
DOID:3083	chronic obstructive pulmonary disease	DOID:1176	bronchial disease	0.137646	0.0207021
DOID:1936	atherosclerosis	DOID:10763	hypertension	0.137052	0.0208516
DOID:9182	pemphigus	DOID:8506	bullous pemphigoid	0.136043	0.0210317
DOID:2825	nose disease	DOID:0050127	sinusitis	0.135014	0.0213053
DOID:8670	eating disorder	DOID:8689	anorexia nervosa	0.134176	0.0215315
DOID:0080001	bone disease	DOID:65	connective tissue disease	0.130875	0.0226063
DOID:2531	hematologic cancer	DOID:4960	bone marrow cancer	0.12918	0.0231285
DOID:6713	cerebrovascular disease	DOID:3407	carotid artery disease	0.128881	0.0231488
DOID:1240	leukemia	DOID:8538	reticulosarcoma	0.128539	0.0231724
DOID:11984	hypertrophic cardiomyopathy	DOID:12930	dilated cardiomyopathy	0.126602	0.0237354
DOID:2868	arterial occlusive disease	DOID:114	heart disease	0.126585	0.0236575
DOID:11963	esophagitis	DOID:13976	peptic esophagitis	0.125684	0.0238976
DOID:848	arthritis	DOID:8398	osteoarthritis	0.125147	0.0240714
DOID:6713	cerebrovascular disease	DOID:10763	hypertension	0.124521	0.024339
DOID:2349	arteriosclerosis	DOID:114	heart disease	0.124277	0.0243446
DOID:2871	endometrial carcinoma	DOID:120	female reproductive organ cancer	0.124201	0.0242828
DOID:7188	autoimmune thyroiditis	DOID:50	thyroid gland disease	0.121836	0.0250772
DOID:1936	atherosclerosis	DOID:114	heart disease	0.119896	0.0257458
DOID:48	male reproductive system disease	DOID:47	prostate disease	0.119615	0.0257833
DOID:9471	meningitis	DOID:10310	viral meningitis	0.118957	0.0259435
DOID:417	hypersensitivity reaction type II disease	DOID:74	hematopoietic system disease	0.118626	0.0259503
DOID:1712	aortic valve stenosis	DOID:4079	heart valve disease	0.118542	0.0258746
DOID:1184	nephrotic syndrome	DOID:10966	lipoid nephrosis	0.117033	0.0264704
DOID:3363	coronary arteriosclerosis	DOID:10763	hypertension	0.115349	0.0271672
DOID:1247	blood coagulation disease	DOID:2218	blood platelet disease	0.114629	0.0273431
DOID:680	tauopathy	DOID:936	brain disease	0.11435	0.0273746
DOID:10652	Alzheimer's disease	DOID:936	brain disease	0.114185	0.0273766
DOID:9383	iridocyclitis	DOID:12030	panuveitis	0.113842	0.0274466
DOID:11476	osteoporosis	DOID:3342	bone inflammation disease	0.113284	0.0275935
DOID:3627	aortic aneurysm	DOID:10941	intracranial aneurysm	0.113034	0.0276206
DOID:1731	histoplasmosis	DOID:12662	paracoccidioidomycosis	0.112298	0.0279038
DOID:3246	embryonal rhabdomyosarcoma	DOID:3247	rhabdomyosarcoma	0.110893	0.0284121
DOID:3342	bone inflammation disease	DOID:8398	osteoarthritis	0.110709	0.0284236
DOID:14069	cerebral malaria	DOID:2789	parasitic protozoa infectious disease	0.110588	0.0284095
DOID:10112	sleeping sickness	DOID:12140	Chagas disease	0.110501	0.0283608
DOID:6713	cerebrovascular disease	DOID:331	central nervous system disease	0.109924	0.0284953
DOID:3455	cerebrovascular accident	DOID:3454	brain infarction	0.10992	0.0284057
DOID:9423	blepharitis	DOID:530	eyelid disease	0.107946	0.0292414
DOID:8692	myeloid leukemia	DOID:0060058	lymphoma	0.107885	0.0291781
DOID:4989	pancreatitis	DOID:26	pancreas disease	0.107849	0.0291121
DOID:6364	migraine	DOID:12783	migraine without aura	0.105943	0.029913
DOID:1852	intrahepatic cholestasis	DOID:13580	cholestasis	0.105235	0.0302136
DOID:178	vascular disease	DOID:10591	pre-eclampsia	0.104488	0.0304414
DOID:699	mitochondrial myopathy	DOID:3687	MELAS syndrome	0.104152	0.0305262
DOID:848	arthritis	DOID:11476	osteoporosis	0.103886	0.0305859
DOID:883	parasitic helminthiasis infectious disease	DOID:2789	parasitic protozoa infectious disease	0.103669	0.030578
DOID:74	hematopoietic system disease	DOID:4961	bone marrow disease	0.10272	0.0309512
DOID:8538	reticulosarcoma	DOID:0060058	lymphoma	0.102418	0.0310304
DOID:1240	leukemia	DOID:4960	bone marrow cancer	0.101497	0.0313303
DOID:381	arthropathy	DOID:1123	spondyloarthropathy	0.101115	0.0313988
DOID:1342	congenital hypoplastic anemia	DOID:4961	bone marrow disease	0.1004	0.0316536
DOID:11963	esophagitis	DOID:9206	Barrett's esophagus	0.100256	0.0316156
DOID:418	systemic scleroderma	DOID:65	connective tissue disease	0.0999335	0.0318114
DOID:1339	Diamond-Blackfan anemia	DOID:1342	congenital hypoplastic anemia	0.0997675	0.0317761
DOID:7693	abdominal aortic aneurysm	DOID:10941	intracranial aneurysm	0.0993318	0.0319286
DOID:3394	ischemic heart disease	DOID:178	vascular disease	0.0990728	0.0319822
DOID:3455	cerebrovascular accident	DOID:10763	hypertension	0.098961	0.031932
DOID:3324	mood disorder	DOID:1470	major depressive disorder	0.0988024	0.0319233
DOID:3310	atopic dermatitis	DOID:37	skin disease	0.0983678	0.0320412
DOID:409	liver disease	DOID:5295	intestinal disease	0.0979383	0.0322346
DOID:2394	ovarian cancer	DOID:363	uterine cancer	0.0968001	0.0327251
DOID:3119	gastrointestinal system cancer	DOID:5093	thoracic cancer	0.0962085	0.0329271
DOID:5419	schizophrenia	DOID:1307	dementia	0.0959629	0.0329738
DOID:3119	gastrointestinal system cancer	DOID:1612	breast cancer	0.0957601	0.0329826
DOID:5082	liver cirrhosis	DOID:12236	primary biliary cirrhosis	0.0953797	0.0330723
DOID:0050127	sinusitis	DOID:4483	rhinitis	0.0951658	0.0331614
DOID:178	vascular disease	DOID:326	ischemia	0.0951534	0.0330661
DOID:3407	carotid artery disease	DOID:3455	cerebrovascular accident	0.0937864	0.033745
DOID:3527	cerebral arterial disease	DOID:3525	middle cerebral artery infarction	0.0936226	0.0337286
DOID:409	liver disease	DOID:2044	drug-induced hepatitis	0.0930677	0.0339544
DOID:5419	schizophrenia	DOID:10652	Alzheimer's disease	0.0929671	0.0339119
DOID:1247	blood coagulation disease	DOID:1588	thrombocytopenia	0.0923111	0.034204
DOID:9970	obesity	DOID:4194	glucose metabolism disease	0.0917134	0.0344492
DOID:1067	open-angle glaucoma	DOID:13544	low tension glaucoma	0.0913206	0.0346197
DOID:10952	nephritis	DOID:557	kidney disease	0.0909516	0.03475
DOID:3525	middle cerebral artery infarction	DOID:13089	intracranial arterial disease	0.090689	0.0348459
DOID:9538	multiple myeloma	DOID:2531	hematologic cancer	0.0906793	0.034757
DOID:854	collagen disease	DOID:9074	systemic lupus erythematosus	0.0903792	0.0348663
DOID:9970	obesity	DOID:9351	diabetes mellitus	0.0903176	0.0347944
DOID:2789	parasitic protozoa infectious disease	DOID:9065	leishmaniasis	0.0896206	0.0351662
DOID:5295	intestinal disease	DOID:5353	colonic disease	0.0893142	0.0352652
DOID:1067	open-angle glaucoma	DOID:5679	retinal disease	0.0886435	0.0355785
DOID:8689	anorexia nervosa	DOID:12129	bulimia nervosa	0.0885426	0.035533
DOID:1459	hypothyroidism	DOID:50	thyroid gland disease	0.0882952	0.0355973
DOID:2868	arterial occlusive disease	DOID:6713	cerebrovascular disease	0.0875769	0.0359536
DOID:865	vasculitis	DOID:13375	temporal arteritis	0.0874175	0.0359428
DOID:3342	bone inflammation disease	DOID:65	connective tissue disease	0.08696	0.0361359
DOID:331	central nervous system disease	DOID:3213	demyelinating disease	0.0866997	0.0362249
DOID:229	female reproductive system disease	DOID:48	male reproductive system disease	0.0864855	0.0363135
DOID:3948	adrenocortical carcinoma	DOID:3953	adrenal gland cancer	0.0863756	0.0362776
DOID:883	parasitic helminthiasis infectious disease	DOID:12365	malaria	0.0854342	0.0368011
DOID:2349	arteriosclerosis	DOID:6713	cerebrovascular disease	0.0848834	0.0370241
DOID:14330	Parkinson's disease	DOID:1289	neurodegenerative disease	0.0842551	0.0373182
DOID:9119	acute myeloid leukemia	DOID:0060058	lymphoma	0.0840898	0.037312
DOID:2377	multiple sclerosis	DOID:331	central nervous system disease	0.0840328	0.0372553
DOID:331	central nervous system disease	DOID:5614	eye disease	0.0838343	0.0372759
DOID:12663	blastomycosis	DOID:12662	paracoccidioidomycosis	0.0833333	0.0375185
DOID:2868	arterial occlusive disease	DOID:3393	coronary heart disease	0.0831264	0.037657
DOID:2394	ovarian cancer	DOID:2871	endometrial carcinoma	0.0829712	0.0376658
DOID:7998	hyperthyroidism	DOID:7188	autoimmune thyroiditis	0.0825238	0.0378871
DOID:6713	cerebrovascular disease	DOID:3454	brain infarction	0.0822948	0.037911
DOID:2349	arteriosclerosis	DOID:3393	coronary heart disease	0.081949	0.0380444
DOID:2921	glomerulonephritis	DOID:557	kidney disease	0.0815883	0.0382292
DOID:0080001	bone disease	DOID:9074	systemic lupus erythematosus	0.081255	0.0383169
DOID:11476	osteoporosis	DOID:7148	rheumatoid arthritis	0.0811924	0.038272
DOID:3119	gastrointestinal system cancer	DOID:2531	hematologic cancer	0.0811249	0.0382171
DOID:6713	cerebrovascular disease	DOID:114	heart disease	0.0808974	0.038268
DOID:1936	atherosclerosis	DOID:6713	cerebrovascular disease	0.0808681	0.0381877
DOID:5679	retinal disease	DOID:8947	diabetic retinopathy	0.0807819	0.0381564
DOID:2527	nephrosis	DOID:10966	lipoid nephrosis	0.0805392	0.0382327
DOID:331	central nervous system disease	DOID:3455	cerebrovascular accident	0.0802389	0.0383061
DOID:1936	atherosclerosis	DOID:3393	coronary heart disease	0.0799468	0.0384733
DOID:848	arthritis	DOID:65	connective tissue disease	0.0796346	0.0385711
DOID:2213	hemorrhagic disease	DOID:2452	thrombophilia	0.0769306	0.0404127
DOID:12132	Wegener's granulomatosis	DOID:13241	Behcet's disease	0.076855	0.0404217
DOID:5082	liver cirrhosis	DOID:2237	hepatitis	0.076826	0.0403401
DOID:3393	coronary heart disease	DOID:10763	hypertension	0.0763528	0.0405678
DOID:9500	leukocyte disease	DOID:999	eosinophilia	0.0761657	0.0405915
DOID:409	liver disease	DOID:0050589	inflammatory bowel disease	0.0760741	0.0405625
DOID:3620	central nervous system cancer	DOID:769	neuroblastoma	0.0756493	0.0407656
DOID:1080	filariasis	DOID:883	parasitic helminthiasis infectious disease	0.07533	0.0409403
DOID:14069	cerebral malaria	DOID:14067	Plasmodium falciparum malaria	0.0744804	0.0415112
DOID:8398	osteoarthritis	DOID:7148	rheumatoid arthritis	0.0739451	0.0418663
DOID:2316	brain ischemia	DOID:178	vascular disease	0.0734658	0.0421383
DOID:594	panic disorder	DOID:4964	neurotic disorder	0.073391	0.0420837
DOID:2723	dermatitis	DOID:2773	contact dermatitis	0.0733163	0.0420319
DOID:1508	candidiasis	DOID:14262	oral candidiasis	0.0729997	0.0421838
DOID:9538	multiple myeloma	DOID:1240	leukemia	0.0728741	0.042176
DOID:9446	cholangitis	DOID:13580	cholestasis	0.0716941	0.0430854
DOID:8692	myeloid leukemia	DOID:8538	reticulosarcoma	0.0703031	0.0442287
DOID:850	lung disease	DOID:3082	interstitial lung disease	0.0702886	0.0441335
DOID:5213	chronic inflammatory demyelinating polyradiculoneuropathy	DOID:12842	Guillain-Barre syndrome	0.0698356	0.044414
DOID:417	hypersensitivity reaction type II disease	DOID:1205	hypersensitivity reaction type I disease	0.0697942	0.044343
DOID:1555	urticaria	DOID:9810	polyarteritis nodosa	0.0697407	0.0441803
DOID:1555	urticaria	DOID:13378	Kawasaki disease	0.0697407	0.0441803
DOID:1100	ovarian disease	DOID:780	placenta disease	0.0694652	0.0443597
DOID:4193	intracranial thrombosis	DOID:3572	intracranial sinus thrombosis	0.0691678	0.0445478
DOID:3363	coronary arteriosclerosis	DOID:6713	cerebrovascular disease	0.0684601	0.0451146
DOID:1024	leprosy	DOID:399	tuberculosis	0.0673567	0.0459738
DOID:13809	familial combined hyperlipidemia	DOID:1168	familial hyperlipidemia	0.067219	0.0459976
DOID:2868	arterial occlusive disease	DOID:3455	cerebrovascular accident	0.0668654	0.0461943
DOID:2355	anemia	DOID:1342	congenital hypoplastic anemia	0.0667893	0.0461608
DOID:1529	penile disease	DOID:8616	Peyronie's disease	0.0666667	0.0461934
DOID:6713	cerebrovascular disease	DOID:1289	neurodegenerative disease	0.0661605	0.0466165
DOID:2349	arteriosclerosis	DOID:3455	cerebrovascular accident	0.0656981	0.0469624
DOID:7148	rheumatoid arthritis	DOID:65	connective tissue disease	0.0655824	0.0469719
DOID:7997	thyrotoxicosis	DOID:50	thyroid gland disease	0.0655157	0.0469346
DOID:9351	diabetes mellitus	DOID:1837	diabetic ketoacidosis	0.0651327	0.0472051
DOID:674	cleft palate	DOID:1682	congenital heart defect	0.0643766	0.0478047
DOID:5082	liver cirrhosis	DOID:5295	intestinal disease	0.0639654	0.0481392
DOID:4194	glucose metabolism disease	DOID:1837	diabetic ketoacidosis	0.0639583	0.0480347
DOID:5093	thoracic cancer	DOID:2531	hematologic cancer	0.0637673	0.0480739
DOID:1936	atherosclerosis	DOID:3455	cerebrovascular accident	0.0636499	0.0480968
DOID:1612	breast cancer	DOID:2531	hematologic cancer	0.0635995	0.0480483
DOID:437	myasthenia gravis	DOID:12842	Guillain-Barre syndrome	0.063109	0.0484794
DOID:9540	vascular skin disease	DOID:11713	diabetic angiopathy	0.0631037	0.0483776
DOID:3525	middle cerebral artery infarction	DOID:3454	brain infarction	0.0629278	0.0484566
DOID:9296	cleft lip	DOID:1682	congenital heart defect	0.062026	0.0492984
DOID:114	heart disease	DOID:3455	cerebrovascular accident	0.0619825	0.049225
DOID:3119	gastrointestinal system cancer	DOID:1240	leukemia	0.0617115	0.0494059
DOID:680	tauopathy	DOID:3213	demyelinating disease	0.0616169	0.0493756
DOID:10652	Alzheimer's disease	DOID:3213	demyelinating disease	0.0614366	0.0494108
DOID:0050589	inflammatory bowel disease	DOID:5353	colonic disease	0.0614022	0.0493401
DOID:1074	kidney failure	DOID:10952	nephritis	0.0612762	0.0493663
DOID:1826	epilepsy syndrome	DOID:2234	focal epilepsy	0.0612272	0.0492937
DOID:178	vascular disease	DOID:331	central nervous system disease	0.0606256	0.0497696
DOID:13636	Fanconi's anemia	DOID:4961	bone marrow disease	0.0606052	0.0497344
DOID:1555	urticaria	DOID:341	peripheral vascular disease	0.0600915	0.050147
DOID:2321	dyspepsia	DOID:76	stomach disease	0.0599578	0.0501778
DOID:750	peptic ulcer	DOID:13976	peptic esophagitis	0.0597862	0.0502195
DOID:2377	multiple sclerosis	DOID:680	tauopathy	0.0597489	0.0501482
DOID:2403	aneurysm disease	DOID:3362	coronary aneurysm	0.0596901	0.0501104
DOID:1686	glaucoma	DOID:5614	eye disease	0.0596653	0.0500308
DOID:6255	growth hormone secreting pituitary adenoma	DOID:5394	prolactinoma	0.0595817	0.0500308
DOID:2377	multiple sclerosis	DOID:10652	Alzheimer's disease	0.059572	0.0499232
DOID:3342	bone inflammation disease	DOID:381	arthropathy	0.0594296	0.0499737
DOID:1289	neurodegenerative disease	DOID:5614	eye disease	0.0591897	0.0501572
DOID:418	systemic scleroderma	DOID:9074	systemic lupus erythematosus	0.0591868	0.0500501
DOID:13580	cholestasis	DOID:14268	sclerosing cholangitis	0.0587236	0.0505043
DOID:9500	leukocyte disease	DOID:74	hematopoietic system disease	0.0586771	0.0504403
DOID:0060058	lymphoma	DOID:4960	bone marrow cancer	0.0584194	0.0506169
DOID:178	vascular disease	DOID:5844	myocardial infarction	0.0583151	0.0506328
DOID:676	juvenile rheumatoid arthritis	DOID:7148	rheumatoid arthritis	0.0582784	0.0505539
DOID:6713	cerebrovascular disease	DOID:13089	intracranial arterial disease	0.058266	0.0504645
DOID:2320	obstructive lung disease	DOID:3082	interstitial lung disease	0.0580874	0.0505429
DOID:2746	glycogen storage disease V	DOID:2747	glycogen storage disease	0.0577827	0.0507859
DOID:3342	bone inflammation disease	DOID:9074	systemic lupus erythematosus	0.0571109	0.051438
DOID:1307	dementia	DOID:3324	mood disorder	0.0571042	0.0513348
DOID:1024	leprosy	DOID:10887	lepromatous leprosy	0.0569224	0.0514213
DOID:8691	mycosis fungoides	DOID:8541	Sezary's disease	0.0567464	0.0515096
DOID:409	liver disease	DOID:403	mouth disease	0.0565941	0.0515763
DOID:50	thyroid gland disease	DOID:26	pancreas disease	0.0564418	0.0516765
DOID:2723	dermatitis	DOID:3042	allergic contact dermatitis	0.0563388	0.051673
DOID:3527	cerebral arterial disease	DOID:6713	cerebrovascular disease	0.0561059	0.0518
DOID:3119	gastrointestinal system cancer	DOID:120	female reproductive organ cancer	0.0560214	0.051792
DOID:8692	myeloid leukemia	DOID:4960	bone marrow cancer	0.0559858	0.0517296
DOID:1074	kidney failure	DOID:2921	glomerulonephritis	0.0558342	0.0518013
DOID:679	basal ganglia disease	DOID:331	central nervous system disease	0.0556389	0.051904
DOID:10652	Alzheimer's disease	DOID:3324	mood disorder	0.055522	0.0519937
DOID:8538	reticulosarcoma	DOID:9119	acute myeloid leukemia	0.0553254	0.0521414
DOID:3394	ischemic heart disease	DOID:10763	hypertension	0.0552539	0.05211
DOID:1686	glaucoma	DOID:13544	low tension glaucoma	0.0551938	0.0520745
DOID:3363	coronary arteriosclerosis	DOID:3455	cerebrovascular accident	0.0544025	0.0528636
DOID:8566	herpes simplex	DOID:8704	genital herpes	0.0544015	0.0527546
DOID:437	myasthenia gravis	DOID:440	neuromuscular disease	0.0541949	0.0528724
DOID:7997	thyrotoxicosis	DOID:7998	hyperthyroidism	0.0541455	0.0528193
DOID:11465	autonomic nervous system disease	DOID:3223	complex regional pain syndrome	0.0537025	0.0531926
DOID:0080001	bone disease	DOID:8398	osteoarthritis	0.0533099	0.053636
DOID:848	arthritis	DOID:9074	systemic lupus erythematosus	0.0532783	0.0535776
DOID:3312	bipolar disorder	DOID:1470	major depressive disorder	0.0531864	0.0535825
DOID:10608	celiac disease	DOID:9074	systemic lupus erythematosus	0.0530071	0.0536646
DOID:12365	malaria	DOID:9065	leishmaniasis	0.0527803	0.0538438
DOID:409	liver disease	DOID:12236	primary biliary cirrhosis	0.0527606	0.053749
DOID:1073	renal hypertension	DOID:11664	nephrosclerosis	0.0524714	0.0539758
DOID:2018	hyperinsulinism	DOID:4989	pancreatitis	0.0521896	0.0541875
DOID:12731	pars planitis	DOID:8886	chorioretinitis	0.0520527	0.0542414
DOID:2218	blood platelet disease	DOID:2452	thrombophilia	0.0520509	0.0541345
DOID:14067	Plasmodium falciparum malaria	DOID:883	parasitic helminthiasis infectious disease	0.0519906	0.0540882
DOID:1826	epilepsy syndrome	DOID:331	central nervous system disease	0.0518996	0.054074
DOID:1080	filariasis	DOID:11678	onchocerciasis	0.051804	0.0540838
DOID:5419	schizophrenia	DOID:3324	mood disorder	0.0516381	0.0541773
DOID:114	heart disease	DOID:6000	congestive heart failure	0.051505	0.0542386
DOID:326	ischemia	DOID:10763	hypertension	0.0511922	0.0545556
DOID:13241	Behcet's disease	DOID:13375	temporal arteritis	0.0511237	0.0545505
DOID:14330	Parkinson's disease	DOID:331	central nervous system disease	0.0505897	0.055164
DOID:0050589	inflammatory bowel disease	DOID:5082	liver cirrhosis	0.0504982	0.0552012
DOID:5353	colonic disease	DOID:2089	constipation	0.0497688	0.0561083
DOID:5082	liver cirrhosis	DOID:2044	drug-induced hepatitis	0.0497215	0.0560747
DOID:3044	food allergy	DOID:4378	peanut allergic reaction	0.0496185	0.0561216
DOID:2355	anemia	DOID:12554	hemolytic-uremic syndrome	0.049423	0.056229
DOID:10113	trypanosomiasis	DOID:2789	parasitic protozoa infectious disease	0.0493788	0.0561621
DOID:1073	renal hypertension	DOID:1591	renovascular hypertension	0.0491551	0.0563626
DOID:5093	thoracic cancer	DOID:1240	leukemia	0.0491478	0.0562607
DOID:1240	leukemia	DOID:1612	breast cancer	0.0490172	0.056332
DOID:9074	systemic lupus erythematosus	DOID:74	hematopoietic system disease	0.0489203	0.0563411
DOID:4138	bile duct disease	DOID:1852	intrahepatic cholestasis	0.0489118	0.0562456
DOID:6713	cerebrovascular disease	DOID:326	ischemia	0.0489092	0.0561371
DOID:1289	neurodegenerative disease	DOID:3455	cerebrovascular accident	0.0486429	0.0563911
DOID:864	phlebitis	DOID:799	varicose veins	0.0483432	0.0565758
DOID:3875	thrombophlebitis	DOID:799	varicose veins	0.0483432	0.0565758
DOID:3393	coronary heart disease	DOID:6713	cerebrovascular disease	0.0482146	0.0566839
DOID:9741	biliary tract disease	DOID:1852	intrahepatic cholestasis	0.0481725	0.0566405
DOID:4194	glucose metabolism disease	DOID:14221	metabolic syndrome X	0.048037	0.0567233
DOID:2868	arterial occlusive disease	DOID:10591	pre-eclampsia	0.047765	0.0569429
DOID:12716	newborn respiratory distress syndrome	DOID:11394	adult respiratory distress syndrome	0.047639	0.0569734
DOID:9746	hemorrhoid	DOID:3128	anus disease	0.047619	0.0567879
DOID:4677	keratitis	DOID:11382	corneal neovascularization	0.047619	0.0567879
DOID:9351	diabetes mellitus	DOID:14221	metabolic syndrome X	0.0474625	0.0569263
DOID:409	liver disease	DOID:8778	Crohn's disease	0.047373	0.0569566
DOID:178	vascular disease	DOID:341	peripheral vascular disease	0.0473696	0.0568512
DOID:2868	arterial occlusive disease	DOID:3394	ischemic heart disease	0.047024	0.0572556
DOID:403	mouth disease	DOID:5295	intestinal disease	0.0469692	0.0572101
DOID:2349	arteriosclerosis	DOID:10591	pre-eclampsia	0.046946	0.0571348
DOID:13641	exfoliation syndrome	DOID:1686	glaucoma	0.0468029	0.0572673
DOID:936	brain disease	DOID:5614	eye disease	0.0467096	0.0572668
DOID:679	basal ganglia disease	DOID:1289	neurodegenerative disease	0.0466219	0.0572886
DOID:848	arthritis	DOID:381	arthropathy	0.0465378	0.0573123
DOID:8649	tongue cancer	DOID:8850	salivary gland cancer	0.0462596	0.0576011
DOID:2349	arteriosclerosis	DOID:3394	ischemic heart disease	0.0462593	0.0574944
DOID:5093	thoracic cancer	DOID:120	female reproductive organ cancer	0.0461871	0.0574935
DOID:13089	intracranial arterial disease	DOID:3455	cerebrovascular accident	0.0461608	0.0574299
DOID:120	female reproductive organ cancer	DOID:1612	breast cancer	0.0460112	0.0575654
DOID:5353	colonic disease	DOID:8778	Crohn's disease	0.0459797	0.0575037
DOID:9538	multiple myeloma	DOID:0060058	lymphoma	0.0458357	0.0575982
DOID:1936	atherosclerosis	DOID:10591	pre-eclampsia	0.045553	0.0578993
DOID:2742	auditory system disease	DOID:5614	eye disease	0.045541	0.0578099
DOID:9540	vascular skin disease	DOID:37	skin disease	0.0455026	0.0577682
DOID:9074	systemic lupus erythematosus	DOID:7148	rheumatoid arthritis	0.0454665	0.0577177
DOID:5353	colonic disease	DOID:8577	ulcerative colitis	0.0454241	0.0577127
DOID:811	lipodystrophy	DOID:0050440	familial partial lipodystrophy	0.0453888	0.0576479
DOID:2868	arterial occlusive disease	DOID:326	ischemia	0.0448411	0.058413
DOID:1936	atherosclerosis	DOID:3394	ischemic heart disease	0.0448318	0.0583237
DOID:5295	intestinal disease	DOID:1285	rectal disease	0.0448077	0.0582563
DOID:12449	aplastic anemia	DOID:583	hemolytic anemia	0.0447755	0.0581982
DOID:2355	anemia	DOID:1247	blood coagulation disease	0.0447569	0.0581151
DOID:0060123	connective tissue benign neoplasm	DOID:2691	myoma	0.0446053	0.0582621
DOID:3527	cerebral arterial disease	DOID:3455	cerebrovascular accident	0.0444719	0.058353
DOID:8432	polycythemia	DOID:4961	bone marrow disease	0.0444183	0.0583792
DOID:0050127	sinusitis	DOID:4481	allergic rhinitis	0.0443997	0.0582946
DOID:2213	hemorrhagic disease	DOID:74	hematopoietic system disease	0.0443221	0.0583066
DOID:2349	arteriosclerosis	DOID:326	ischemia	0.044209	0.058363
DOID:418	systemic scleroderma	DOID:417	hypersensitivity reaction type II disease	0.0440598	0.0584263
DOID:1024	leprosy	DOID:2957	pulmonary tuberculosis	0.0440426	0.0583457
DOID:9119	acute myeloid leukemia	DOID:4960	bone marrow cancer	0.0439949	0.0583274
DOID:409	liver disease	DOID:9741	biliary tract disease	0.0438995	0.058371
DOID:8466	retinal degeneration	DOID:8947	diabetic retinopathy	0.0438313	0.0583827
DOID:0080001	bone disease	DOID:331	central nervous system disease	0.0437911	0.0583398
DOID:14330	Parkinson's disease	DOID:680	tauopathy	0.0436835	0.0583656
DOID:10652	Alzheimer's disease	DOID:14330	Parkinson's disease	0.0436357	0.0583404
DOID:409	liver disease	DOID:4138	bile duct disease	0.0435903	0.0583152
DOID:5409	lung small cell carcinoma	DOID:3908	non-small cell lung carcinoma	0.0433784	0.0585559
DOID:3527	cerebral arterial disease	DOID:13099	Moyamoya disease	0.0432871	0.0586091
DOID:3082	interstitial lung disease	DOID:1176	bronchial disease	0.0432619	0.058547
DOID:2452	thrombophilia	DOID:1588	thrombocytopenia	0.0430578	0.0587548
DOID:12336	male infertility	DOID:47	prostate disease	0.0430574	0.0586545
DOID:1936	atherosclerosis	DOID:326	ischemia	0.0428691	0.0588094
DOID:2841	asthma	DOID:3082	interstitial lung disease	0.0428559	0.0587457
DOID:6713	cerebrovascular disease	DOID:680	tauopathy	0.0428531	0.0586477
DOID:10652	Alzheimer's disease	DOID:6713	cerebrovascular disease	0.0428068	0.0586293
DOID:6713	cerebrovascular disease	DOID:13001	carotid stenosis	0.0428062	0.0585284
DOID:12574	posterior uveitis	DOID:12030	panuveitis	0.0426839	0.0586495
DOID:2825	nose disease	DOID:850	lung disease	0.0424956	0.0588336
DOID:4193	intracranial thrombosis	DOID:3410	carotid artery thrombosis	0.0424234	0.058839
DOID:11476	osteoporosis	DOID:65	connective tissue disease	0.0423744	0.0588068
DOID:11396	pulmonary edema	DOID:11162	respiratory failure	0.0422537	0.0588635
DOID:114	heart disease	DOID:331	central nervous system disease	0.0418802	0.0593135
DOID:2742	auditory system disease	DOID:3426	vestibular disease	0.0418275	0.0592993
DOID:13089	intracranial arterial disease	DOID:13099	Moyamoya disease	0.0417684	0.0592869
DOID:1686	glaucoma	DOID:9282	ocular hypertension	0.0417205	0.0592525
DOID:417	hypersensitivity reaction type II disease	DOID:1247	blood coagulation disease	0.041655	0.0592843
DOID:1909	melanoma	DOID:1749	squamous cell carcinoma	0.0416202	0.0592331
DOID:848	arthritis	DOID:676	juvenile rheumatoid arthritis	0.0414924	0.059339
DOID:409	liver disease	DOID:8577	ulcerative colitis	0.0413982	0.0594007
DOID:326	ischemia	DOID:3455	cerebrovascular accident	0.0413077	0.0594118
DOID:2316	brain ischemia	DOID:10763	hypertension	0.0410018	0.0597852
DOID:2789	parasitic protozoa infectious disease	DOID:12140	Chagas disease	0.0407815	0.0600503
DOID:2355	anemia	DOID:11758	iron deficiency anemia	0.0407427	0.06001
DOID:229	female reproductive system disease	DOID:12336	male infertility	0.0406942	0.06
DOID:2316	brain ischemia	DOID:6713	cerebrovascular disease	0.040683	0.0599183
DOID:1727	retinal vein occlusion	DOID:8947	diabetic retinopathy	0.0405312	0.0600133
DOID:6713	cerebrovascular disease	DOID:1826	epilepsy syndrome	0.040415	0.0601362
DOID:3393	coronary heart disease	DOID:4248	coronary stenosis	0.040398	0.0600697
DOID:9538	multiple myeloma	DOID:8692	myeloid leukemia	0.0403664	0.0600099
DOID:1459	hypothyroidism	DOID:7998	hyperthyroidism	0.0403493	0.0599306
DOID:114	heart disease	DOID:326	ischemia	0.0403181	0.0598977
DOID:114	heart disease	DOID:10591	pre-eclampsia	0.0402674	0.0598534
DOID:2377	multiple sclerosis	DOID:2378	relapsing-remitting multiple sclerosis	0.0401144	0.059949
DOID:2355	anemia	DOID:13636	Fanconi's anemia	0.0400557	0.0599557
DOID:6713	cerebrovascular disease	DOID:679	basal ganglia disease	0.0398419	0.0602607
DOID:2018	hyperinsulinism	DOID:50	thyroid gland disease	0.0396505	0.0604845
DOID:3363	coronary arteriosclerosis	DOID:10591	pre-eclampsia	0.0396085	0.0604395
DOID:883	parasitic helminthiasis infectious disease	DOID:1496	echinococcosis	0.0395331	0.0605008
DOID:3394	ischemic heart disease	DOID:6713	cerebrovascular disease	0.0395187	0.0604186
DOID:331	central nervous system disease	DOID:557	kidney disease	0.0394689	0.0604098
DOID:11713	diabetic angiopathy	DOID:9810	polyarteritis nodosa	0.0393678	0.060376
DOID:11713	diabetic angiopathy	DOID:13378	Kawasaki disease	0.0393678	0.060376
DOID:3328	temporal lobe epilepsy	DOID:1826	epilepsy syndrome	0.0392152	0.060568
DOID:1417	choroid disease	DOID:13141	uveitis	0.0390809	0.060664
DOID:2825	nose disease	DOID:2320	obstructive lung disease	0.038962	0.0607694
DOID:120	female reproductive organ cancer	DOID:2531	hematologic cancer	0.0388693	0.0608357
DOID:8538	reticulosarcoma	DOID:4960	bone marrow cancer	0.0388412	0.060791
DOID:2378	relapsing-remitting multiple sclerosis	DOID:3213	demyelinating disease	0.0388087	0.060748
DOID:7682	ruptured aortic aneurysm	DOID:3627	aortic aneurysm	0.0385435	0.0611843
DOID:5679	retinal disease	DOID:331	central nervous system disease	0.0383667	0.061432
DOID:178	vascular disease	DOID:1289	neurodegenerative disease	0.0383004	0.0614217
DOID:3393	coronary heart disease	DOID:3455	cerebrovascular accident	0.0382067	0.0614976
DOID:1059	intellectual disability	DOID:12849	autistic disorder	0.038193	0.0614236
DOID:403	mouth disease	DOID:0050589	inflammatory bowel disease	0.0381551	0.0613816
DOID:6713	cerebrovascular disease	DOID:10591	pre-eclampsia	0.0381512	0.0612857
DOID:440	neuromuscular disease	DOID:10595	Charcot-Marie-Tooth disease	0.0381303	0.0612139
DOID:936	brain disease	DOID:3213	demyelinating disease	0.03808	0.0612136
DOID:12556	acute kidney tubular necrosis	DOID:3021	acute kidney failure	0.0380058	0.0612417
DOID:403	mouth disease	DOID:5082	liver cirrhosis	0.0377162	0.0616593
DOID:6050	esophageal disease	DOID:13976	peptic esophagitis	0.0374141	0.0621339
DOID:14330	Parkinson's disease	DOID:6713	cerebrovascular disease	0.0372004	0.0624277
DOID:3363	coronary arteriosclerosis	DOID:326	ischemia	0.0371462	0.0624301
DOID:576	proteinuria	DOID:557	kidney disease	0.037087	0.0624263
DOID:184	bone cancer	DOID:3347	osteosarcoma	0.0370651	0.0623646
DOID:2377	multiple sclerosis	DOID:936	brain disease	0.0369235	0.0625484
DOID:2789	parasitic protozoa infectious disease	DOID:9111	cutaneous leishmaniasis	0.0368151	0.0626178
DOID:13641	exfoliation syndrome	DOID:1067	open-angle glaucoma	0.0368064	0.0625312
DOID:2868	arterial occlusive disease	DOID:2316	brain ischemia	0.0367107	0.0626112
DOID:2174	ocular cancer	DOID:3093	nervous system cancer	0.0366119	0.0627081
DOID:2394	ovarian cancer	DOID:3119	gastrointestinal system cancer	0.0364615	0.0628729
DOID:676	juvenile rheumatoid arthritis	DOID:3342	bone inflammation disease	0.0364508	0.0627957
DOID:1094	attention deficit hyperactivity disorder	DOID:12849	autistic disorder	0.0363741	0.0628176
DOID:2349	arteriosclerosis	DOID:2316	brain ischemia	0.0362004	0.0630509
DOID:2174	ocular cancer	DOID:3479	uveal cancer	0.0361018	0.0631371
DOID:1067	open-angle glaucoma	DOID:5614	eye disease	0.0359247	0.0633846
DOID:780	placenta disease	DOID:48	male reproductive system disease	0.0357972	0.0635161
DOID:865	vasculitis	DOID:178	vascular disease	0.0357595	0.0634939
DOID:9074	systemic lupus erythematosus	DOID:1205	hypersensitivity reaction type I disease	0.0355783	0.0637734
DOID:1936	atherosclerosis	DOID:2316	brain ischemia	0.0353616	0.064104
DOID:2986	IgA glomerulonephritis	DOID:557	kidney disease	0.0353591	0.0640107
DOID:12574	posterior uveitis	DOID:1407	anterior uveitis	0.0352567	0.0640945
DOID:2316	brain ischemia	DOID:3455	cerebrovascular accident	0.03525	0.0640137
DOID:14067	Plasmodium falciparum malaria	DOID:9065	leishmaniasis	0.0352352	0.0639438
DOID:8670	eating disorder	DOID:1094	attention deficit hyperactivity disorder	0.035008	0.0642959
DOID:680	tauopathy	DOID:5614	eye disease	0.0348173	0.0645212
DOID:1883	hepatitis C	DOID:526	Human immunodeficiency virus infectious disease	0.034773	0.0645204
DOID:10652	Alzheimer's disease	DOID:5614	eye disease	0.0347479	0.0644804
DOID:9383	iridocyclitis	DOID:13141	uveitis	0.0347022	0.064448
DOID:13001	carotid stenosis	DOID:3455	cerebrovascular accident	0.0345561	0.0646235
DOID:3363	coronary arteriosclerosis	DOID:4248	coronary stenosis	0.0345466	0.0645444
DOID:10113	trypanosomiasis	DOID:12365	malaria	0.0344046	0.0647222
DOID:1100	ovarian disease	DOID:48	male reproductive system disease	0.0342578	0.0649085
DOID:1289	neurodegenerative disease	DOID:332	amyotrophic lateral sclerosis	0.0342219	0.0648832
DOID:2355	anemia	DOID:4961	bone marrow disease	0.034188	0.0648729
DOID:3083	chronic obstructive pulmonary disease	DOID:3082	interstitial lung disease	0.0341519	0.0648343
DOID:6364	migraine	DOID:936	brain disease	0.0341327	0.0647809
DOID:7998	hyperthyroidism	DOID:26	pancreas disease	0.0340753	0.0648021
DOID:5844	myocardial infarction	DOID:10763	hypertension	0.0334985	0.065896
DOID:3082	interstitial lung disease	DOID:10322	berylliosis	0.0334328	0.0659407
DOID:4194	glucose metabolism disease	DOID:2018	hyperinsulinism	0.0334045	0.0658978
DOID:3119	gastrointestinal system cancer	DOID:170	endocrine gland cancer	0.0331447	0.0663728
DOID:2868	arterial occlusive disease	DOID:13001	carotid stenosis	0.0331185	0.066325
DOID:381	arthropathy	DOID:7148	rheumatoid arthritis	0.0331053	0.0662478
DOID:4194	glucose metabolism disease	DOID:331	central nervous system disease	0.0330956	0.066162
DOID:5082	liver cirrhosis	DOID:8778	Crohn's disease	0.0328246	0.0666191
DOID:9553	adrenal gland disease	DOID:3946	pituitary-dependent Cushing's disease	0.0327724	0.0666402
DOID:9741	biliary tract disease	DOID:5082	liver cirrhosis	0.032666	0.0667683
DOID:9351	diabetes mellitus	DOID:331	central nervous system disease	0.0326053	0.0667862
DOID:0080001	bone disease	DOID:1289	neurodegenerative disease	0.0324841	0.0669547
DOID:3119	gastrointestinal system cancer	DOID:3093	nervous system cancer	0.0324721	0.0668745
DOID:4138	bile duct disease	DOID:5082	liver cirrhosis	0.0324497	0.0668338
DOID:1067	open-angle glaucoma	DOID:9282	ocular hypertension	0.0324491	0.066738
DOID:8947	diabetic retinopathy	DOID:5614	eye disease	0.0324037	0.066734
DOID:2789	parasitic protozoa infectious disease	DOID:9146	visceral leishmaniasis	0.032388	0.0666778
DOID:850	lung disease	DOID:4483	rhinitis	0.0322894	0.0667783
DOID:583	hemolytic anemia	DOID:74	hematopoietic system disease	0.0322164	0.0668234
DOID:178	vascular disease	DOID:936	brain disease	0.0321935	0.0667717
DOID:680	tauopathy	DOID:3455	cerebrovascular accident	0.0321677	0.0667201
DOID:10652	Alzheimer's disease	DOID:3455	cerebrovascular accident	0.0321398	0.0666772
DOID:5419	schizophrenia	DOID:3312	bipolar disorder	0.0321192	0.0666302
DOID:2316	brain ischemia	DOID:114	heart disease	0.0320681	0.0666336
DOID:9351	diabetes mellitus	DOID:2018	hyperinsulinism	0.0318839	0.0669541
DOID:2825	nose disease	DOID:1176	bronchial disease	0.0318307	0.0669628
DOID:2394	ovarian cancer	DOID:5093	thoracic cancer	0.0318043	0.0669156
DOID:3394	ischemic heart disease	DOID:3455	cerebrovascular accident	0.0317725	0.0668886
DOID:9538	multiple myeloma	DOID:9119	acute myeloid leukemia	0.0317713	0.0667932
DOID:615	leukopenia	DOID:74	hematopoietic system disease	0.0317296	0.066802
DOID:2394	ovarian cancer	DOID:1612	breast cancer	0.0317252	0.0667255
DOID:2218	blood platelet disease	DOID:74	hematopoietic system disease	0.0317013	0.0666747
DOID:7682	ruptured aortic aneurysm	DOID:7693	abdominal aortic aneurysm	0.0316933	0.0665901
DOID:1826	epilepsy syndrome	DOID:3455	cerebrovascular accident	0.0316759	0.0665297
DOID:14115	toxic shock syndrome	DOID:1116	pertussis	0.0316511	0.0664866
DOID:936	brain disease	DOID:3407	carotid artery disease	0.031631	0.066435
DOID:5614	eye disease	DOID:11832	visual epilepsy	0.0315934	0.0664147
DOID:2841	asthma	DOID:2825	nose disease	0.0315606	0.0663831
DOID:3119	gastrointestinal system cancer	DOID:11054	urinary bladder cancer	0.0312155	0.0670169
DOID:1094	attention deficit hyperactivity disorder	DOID:12129	bulimia nervosa	0.031201	0.0669551
DOID:3455	cerebrovascular accident	DOID:10591	pre-eclampsia	0.0310329	0.0671865
DOID:2316	brain ischemia	DOID:3363	coronary arteriosclerosis	0.0309347	0.0672983
DOID:8670	eating disorder	DOID:12849	autistic disorder	0.0308811	0.0673035
DOID:11465	autonomic nervous system disease	DOID:1811	reflex sympathetic dystrophy	0.0308643	0.0672486
DOID:1508	candidiasis	DOID:2272	vulvovaginal candidiasis	0.030772	0.067364
DOID:2349	arteriosclerosis	DOID:13001	carotid stenosis	0.030772	0.0672702
DOID:10124	corneal disease	DOID:4677	keratitis	0.0307595	0.0672128
DOID:12449	aplastic anemia	DOID:1339	Diamond-Blackfan anemia	0.0307301	0.0671792
DOID:9538	multiple myeloma	DOID:8538	reticulosarcoma	0.030679	0.0672164
DOID:1240	leukemia	DOID:120	female reproductive organ cancer	0.0306508	0.067187
DOID:2868	arterial occlusive disease	DOID:5844	myocardial infarction	0.0305446	0.0673596
DOID:1289	neurodegenerative disease	DOID:1826	epilepsy syndrome	0.0305421	0.0672749
DOID:2355	anemia	DOID:2452	thrombophilia	0.0303906	0.0674952
DOID:0080001	bone disease	DOID:178	vascular disease	0.0302546	0.0677204
DOID:2349	arteriosclerosis	DOID:5844	myocardial infarction	0.0300978	0.067978
DOID:679	basal ganglia disease	DOID:3455	cerebrovascular accident	0.0300616	0.067978
DOID:850	lung disease	DOID:331	central nervous system disease	0.0300013	0.0680233
DOID:1936	atherosclerosis	DOID:13001	carotid stenosis	0.0299663	0.0680137
DOID:2320	obstructive lung disease	DOID:4483	rhinitis	0.0299486	0.0679713
DOID:3627	aortic aneurysm	DOID:3362	coronary aneurysm	0.0298675	0.0680505
DOID:13884	sick sinus syndrome	DOID:0050451	Brugada syndrome	0.0298667	0.0679577
DOID:1247	blood coagulation disease	DOID:4961	bone marrow disease	0.0297554	0.0681131
DOID:5679	retinal disease	DOID:2742	auditory system disease	0.0297487	0.0680327
DOID:417	hypersensitivity reaction type II disease	DOID:331	central nervous system disease	0.0296495	0.0681658
DOID:3342	bone inflammation disease	DOID:7147	ankylosing spondylitis	0.0295896	0.068213
DOID:5082	liver cirrhosis	DOID:8577	ulcerative colitis	0.0294082	0.0685447
DOID:5223	infertility	DOID:229	female reproductive system disease	0.029401	0.0684641
DOID:169	neuroendocrine tumor	DOID:5394	prolactinoma	0.0294006	0.0683716
DOID:1307	dementia	DOID:3312	bipolar disorder	0.029389	0.068305
DOID:1289	neurodegenerative disease	DOID:5679	retinal disease	0.029303	0.0683989
DOID:1936	atherosclerosis	DOID:5844	myocardial infarction	0.0292476	0.0684213
DOID:2321	dyspepsia	DOID:4029	gastritis	0.0292221	0.0683938
DOID:1289	neurodegenerative disease	DOID:114	heart disease	0.0291271	0.0685047
DOID:12365	malaria	DOID:12140	Chagas disease	0.0290567	0.0685724
DOID:3093	nervous system cancer	DOID:2531	hematologic cancer	0.0288962	0.0688153
DOID:8955	sideroblastic anemia	DOID:12449	aplastic anemia	0.0288313	0.0688864
DOID:331	central nervous system disease	DOID:10763	hypertension	0.0286823	0.0691802
DOID:0050589	inflammatory bowel disease	DOID:1285	rectal disease	0.0286318	0.0691853
DOID:10652	Alzheimer's disease	DOID:3312	bipolar disorder	0.0285952	0.0691678
DOID:893	Wilson disease	DOID:896	metal metabolism disorder	0.0285468	0.0691955
DOID:5093	thoracic cancer	DOID:170	endocrine gland cancer	0.028538	0.0691301
DOID:437	myasthenia gravis	DOID:3635	congenital myasthenic syndrome	0.0284693	0.0691817
DOID:170	endocrine gland cancer	DOID:1612	breast cancer	0.0284084	0.0692424
DOID:8692	myeloid leukemia	DOID:3119	gastrointestinal system cancer	0.0283262	0.0693717
DOID:5082	liver cirrhosis	DOID:14018	alcoholic liver cirrhosis	0.0281153	0.0698203
DOID:14330	Parkinson's disease	DOID:3455	cerebrovascular accident	0.0280493	0.0698971
DOID:341	peripheral vascular disease	DOID:10763	hypertension	0.0280372	0.069834
DOID:1926	Gaucher's disease	DOID:9455	lipid storage disease	0.0279535	0.0699355
DOID:0080001	bone disease	DOID:381	arthropathy	0.0279023	0.0699895
DOID:1289	neurodegenerative disease	DOID:557	kidney disease	0.0278974	0.0699068
DOID:417	hypersensitivity reaction type II disease	DOID:2452	thrombophilia	0.0277496	0.0701979
DOID:178	vascular disease	DOID:557	kidney disease	0.0277273	0.0701832
DOID:3119	gastrointestinal system cancer	DOID:0060058	lymphoma	0.0276407	0.0702967
DOID:9065	leishmaniasis	DOID:9155	mucocutaneous leishmaniasis	0.0276325	0.0702454
DOID:2742	auditory system disease	DOID:10754	otitis media	0.0276143	0.0701982
DOID:1094	attention deficit hyperactivity disorder	DOID:1059	intellectual disability	0.0276038	0.0701341
DOID:1074	kidney failure	DOID:576	proteinuria	0.0275896	0.0700832
DOID:3525	middle cerebral artery infarction	DOID:8725	vascular dementia	0.0273808	0.0704857
DOID:7693	abdominal aortic aneurysm	DOID:3362	coronary aneurysm	0.0273704	0.0704202
DOID:5093	thoracic cancer	DOID:3093	nervous system cancer	0.0273247	0.070456
DOID:0050597	intestinal schistosomiasis	DOID:1394	urinary schistosomiasis	0.0272872	0.0704528
DOID:1612	breast cancer	DOID:3093	nervous system cancer	0.0272751	0.0703876
DOID:1555	urticaria	DOID:14735	hereditary angioedema	0.027179	0.0705677
DOID:11476	osteoporosis	DOID:9074	systemic lupus erythematosus	0.0271669	0.0705077
DOID:1074	kidney failure	DOID:331	central nervous system disease	0.0271164	0.070538
DOID:1508	candidiasis	DOID:13166	allergic bronchopulmonary aspergillosis	0.0270964	0.0705
DOID:12449	aplastic anemia	DOID:74	hematopoietic system disease	0.0270491	0.0705186
DOID:3426	vestibular disease	DOID:10003	sensorineural hearing loss	0.0269734	0.0706115
DOID:3363	coronary arteriosclerosis	DOID:13001	carotid stenosis	0.0269226	0.0706274
DOID:440	neuromuscular disease	DOID:0080001	bone disease	0.0268559	0.0707199
DOID:12129	bulimia nervosa	DOID:12849	autistic disorder	0.0268501	0.0706488
DOID:1024	leprosy	DOID:1025	tuberculoid leprosy	0.0268159	0.0706633
DOID:1749	squamous cell carcinoma	DOID:3119	gastrointestinal system cancer	0.0267647	0.0706879
DOID:12176	goiter	DOID:50	thyroid gland disease	0.0267414	0.0706374
DOID:3393	coronary heart disease	DOID:6000	congestive heart failure	0.0265598	0.0710508
DOID:3407	carotid artery disease	DOID:3454	brain infarction	0.0265151	0.0710635
DOID:224	transient cerebral ischemia	DOID:2316	brain ischemia	0.0264035	0.0712573
DOID:6713	cerebrovascular disease	DOID:5844	myocardial infarction	0.0263719	0.0712443
DOID:2394	ovarian cancer	DOID:2531	hematologic cancer	0.0261508	0.071737
DOID:417	hypersensitivity reaction type II disease	DOID:13241	Behcet's disease	0.0259657	0.0721894
DOID:848	arthritis	DOID:7147	ankylosing spondylitis	0.0259396	0.0721728
DOID:10608	celiac disease	DOID:74	hematopoietic system disease	0.0259353	0.0720932
DOID:2218	blood platelet disease	DOID:2228	thrombocytosis	0.0259253	0.072034
DOID:3393	coronary heart disease	DOID:326	ischemia	0.0258376	0.0721884
DOID:421	hair disease	DOID:37	skin disease	0.0258208	0.0721343
DOID:11459	pseudotumor cerebri	DOID:9428	intracranial hypertension	0.0257143	0.0723672
DOID:74	hematopoietic system disease	DOID:1588	thrombocytopenia	0.0256194	0.0725607
DOID:1074	kidney failure	DOID:2986	IgA glomerulonephritis	0.0255766	0.0725675
DOID:11054	urinary bladder cancer	DOID:5093	thoracic cancer	0.0255166	0.0726667
DOID:2868	arterial occlusive disease	DOID:341	peripheral vascular disease	0.0255078	0.0726097
DOID:679	basal ganglia disease	DOID:1826	epilepsy syndrome	0.0254988	0.072543
DOID:11054	urinary bladder cancer	DOID:1612	breast cancer	0.0254276	0.0726231
DOID:883	parasitic helminthiasis infectious disease	DOID:9065	leishmaniasis	0.0253952	0.0726161
DOID:178	vascular disease	DOID:3407	carotid artery disease	0.0251817	0.0730968
DOID:2403	aneurysm disease	DOID:178	vascular disease	0.0250454	0.0733965
DOID:184	bone cancer	DOID:3302	chordoma	0.0250346	0.0733453
DOID:12365	malaria	DOID:9111	cutaneous leishmaniasis	0.0250306	0.0732621
DOID:2349	arteriosclerosis	DOID:341	peripheral vascular disease	0.0249836	0.0733346
DOID:674	cleft palate	DOID:13832	patent ductus arteriosus	0.0249592	0.0733107
DOID:2320	obstructive lung disease	DOID:331	central nervous system disease	0.0249549	0.0732401
DOID:0080001	bone disease	DOID:854	collagen disease	0.0249209	0.0732509
DOID:3393	coronary heart disease	DOID:10591	pre-eclampsia	0.0247729	0.0735602
DOID:14069	cerebral malaria	DOID:883	parasitic helminthiasis infectious disease	0.024762	0.0735043
DOID:4483	rhinitis	DOID:1176	bronchial disease	0.0246517	0.073739
DOID:403	mouth disease	DOID:8778	Crohn's disease	0.0246357	0.0736916
DOID:11512	hepatic vein thrombosis	DOID:10762	portal hypertension	0.024597	0.0737078
DOID:1682	congenital heart defect	DOID:1882	atrial heart septal defect	0.0245876	0.0736569
DOID:2841	asthma	DOID:4483	rhinitis	0.0245312	0.0737037
DOID:9540	vascular skin disease	DOID:2723	dermatitis	0.0245247	0.0736334
DOID:1936	atherosclerosis	DOID:341	peripheral vascular disease	0.0244374	0.0737981
DOID:1555	urticaria	DOID:2723	dermatitis	0.0243868	0.0738797
DOID:170	endocrine gland cancer	DOID:2531	hematologic cancer	0.0243372	0.0739284
DOID:9296	cleft lip	DOID:13832	patent ductus arteriosus	0.024296	0.0739782
DOID:331	central nervous system disease	DOID:74	hematopoietic system disease	0.0242221	0.0740981
DOID:13641	exfoliation syndrome	DOID:1417	choroid disease	0.0242017	0.074075
DOID:1240	leukemia	DOID:3093	nervous system cancer	0.0241931	0.0740036
DOID:13543	hyperparathyroidism	DOID:26	pancreas disease	0.0241647	0.0739807
DOID:3393	coronary heart disease	DOID:4247	coronary restenosis	0.0241434	0.0739313
DOID:680	tauopathy	DOID:679	basal ganglia disease	0.0240751	0.0740325
DOID:9810	polyarteritis nodosa	DOID:37	skin disease	0.0240614	0.073886
DOID:37	skin disease	DOID:13378	Kawasaki disease	0.0240614	0.073886
DOID:615	leukopenia	DOID:999	eosinophilia	0.0240503	0.0738333
DOID:10652	Alzheimer's disease	DOID:679	basal ganglia disease	0.0240486	0.0737473
DOID:1091	tooth disease	DOID:409	liver disease	0.0240031	0.0737871
DOID:3805	porokeratosis	DOID:161	keratosis	0.0238727	0.0740633
DOID:850	lung disease	DOID:11162	respiratory failure	0.0238588	0.0740274
DOID:14330	Parkinson's disease	DOID:1826	epilepsy syndrome	0.0238409	0.0739833
DOID:14067	Plasmodium falciparum malaria	DOID:10113	trypanosomiasis	0.0237092	0.0742893
DOID:2018	hyperinsulinism	DOID:7998	hyperthyroidism	0.0236714	0.0743151
DOID:13636	Fanconi's anemia	DOID:1339	Diamond-Blackfan anemia	0.0235004	0.0747684
DOID:8692	myeloid leukemia	DOID:5093	thoracic cancer	0.0233655	0.0750985
DOID:12132	Wegener's granulomatosis	DOID:13375	temporal arteritis	0.0233525	0.0750332
DOID:8692	myeloid leukemia	DOID:1612	breast cancer	0.0233247	0.0750225
DOID:1205	hypersensitivity reaction type I disease	DOID:74	hematopoietic system disease	0.0232628	0.0750969
DOID:3363	coronary arteriosclerosis	DOID:6000	congestive heart failure	0.0232485	0.0750579
DOID:1724	duodenal ulcer	DOID:13976	peptic esophagitis	0.023242	0.0749976
DOID:11054	urinary bladder cancer	DOID:2531	hematologic cancer	0.0232068	0.0750035
DOID:403	mouth disease	DOID:8577	ulcerative colitis	0.0231137	0.0752141
DOID:3394	ischemic heart disease	DOID:6000	congestive heart failure	0.023106	0.0751504
DOID:4051	alveolar rhabdomyosarcoma	DOID:3247	rhabdomyosarcoma	0.0229379	0.0755763
DOID:1285	rectal disease	DOID:8778	Crohn's disease	0.0228919	0.0756366
DOID:9993	hypoglycemia	DOID:2018	hyperinsulinism	0.022868	0.0756253
DOID:7148	rheumatoid arthritis	DOID:7147	ankylosing spondylitis	0.0228674	0.0755415
DOID:5093	thoracic cancer	DOID:0060058	lymphoma	0.0228536	0.0755047
DOID:1612	breast cancer	DOID:0060058	lymphoma	0.0227977	0.0755648
DOID:4194	glucose metabolism disease	DOID:1289	neurodegenerative disease	0.0227862	0.0755152
DOID:0080001	bone disease	DOID:114	heart disease	0.022681	0.0757625
DOID:3310	atopic dermatitis	DOID:2773	contact dermatitis	0.0226656	0.0757163
DOID:1285	rectal disease	DOID:8577	ulcerative colitis	0.022569	0.0759477
DOID:4194	glucose metabolism disease	DOID:10575	calcium metabolism disease	0.0225138	0.0760348
DOID:9351	diabetes mellitus	DOID:1289	neurodegenerative disease	0.0224699	0.0760823
DOID:10808	gastric ulcer	DOID:13976	peptic esophagitis	0.0224349	0.0761169
DOID:1529	penile disease	DOID:48	male reproductive system disease	0.0223862	0.0761746
DOID:9500	leukocyte disease	DOID:1247	blood coagulation disease	0.022343	0.0761952
DOID:865	vasculitis	DOID:864	phlebitis	0.0223036	0.0761187
DOID:865	vasculitis	DOID:3875	thrombophlebitis	0.0223036	0.0761187
DOID:850	lung disease	DOID:1289	neurodegenerative disease	0.0223024	0.0760368
DOID:2723	dermatitis	DOID:9182	pemphigus	0.0222971	0.0759563
DOID:10124	corneal disease	DOID:5614	eye disease	0.0222819	0.0759231
DOID:9351	diabetes mellitus	DOID:10575	calcium metabolism disease	0.0222549	0.0759186
DOID:3342	bone inflammation disease	DOID:331	central nervous system disease	0.0222195	0.0759748
DOID:3394	ischemic heart disease	DOID:326	ischemia	0.0222125	0.0759062
DOID:10608	celiac disease	DOID:1205	hypersensitivity reaction type I disease	0.0221117	0.0761303
DOID:5679	retinal disease	DOID:936	brain disease	0.0221006	0.0760731
DOID:2773	contact dermatitis	DOID:37	skin disease	0.0220702	0.0760661
DOID:4193	intracranial thrombosis	DOID:3576	sagittal sinus thrombosis	0.022058	0.0760205
DOID:417	hypersensitivity reaction type II disease	DOID:1289	neurodegenerative disease	0.0219773	0.0761809
DOID:2174	ocular cancer	DOID:3620	central nervous system cancer	0.0219432	0.0761864
DOID:326	ischemia	DOID:10591	pre-eclampsia	0.0219053	0.0762134
DOID:114	heart disease	DOID:936	brain disease	0.0219029	0.0761372
DOID:5844	myocardial infarction	DOID:3455	cerebrovascular accident	0.0217715	0.0765402
DOID:12157	aseptic meningitis	DOID:9471	meningitis	0.0217418	0.0765464
DOID:12987	agranulocytosis	DOID:74	hematopoietic system disease	0.0216879	0.0766452
DOID:3363	coronary arteriosclerosis	DOID:341	peripheral vascular disease	0.0216461	0.0767111
DOID:417	hypersensitivity reaction type II disease	DOID:12236	primary biliary cirrhosis	0.0215982	0.0767982
DOID:3347	osteosarcoma	DOID:8632	Kaposi's sarcoma	0.0215929	0.0767275
DOID:680	tauopathy	DOID:178	vascular disease	0.0215826	0.0766783
DOID:2316	brain ischemia	DOID:3393	coronary heart disease	0.0215802	0.0765955
DOID:10652	Alzheimer's disease	DOID:178	vascular disease	0.0215243	0.0766869
DOID:850	lung disease	DOID:178	vascular disease	0.0214988	0.076676
DOID:1926	Gaucher's disease	DOID:14499	Fabry disease	0.0214667	0.0766999
DOID:3347	osteosarcoma	DOID:5158	pleural neoplasm	0.0214306	0.0767226
DOID:9155	mucocutaneous leishmaniasis	DOID:9111	cutaneous leishmaniasis	0.021429	0.0766425
DOID:896	metal metabolism disorder	DOID:14452	hypokalemic periodic paralysis	0.0213932	0.0766741
DOID:8466	retinal degeneration	DOID:331	central nervous system disease	0.0213009	0.0769108
DOID:4194	glucose metabolism disease	DOID:182	calcinosis	0.0212533	0.0769978
DOID:4194	glucose metabolism disease	DOID:178	vascular disease	0.0212212	0.0770189
DOID:9675	pulmonary emphysema	DOID:3083	chronic obstructive pulmonary disease	0.021191	0.0770367
DOID:114	heart disease	DOID:12930	dilated cardiomyopathy	0.0211846	0.0769678
DOID:3363	coronary arteriosclerosis	DOID:4247	coronary restenosis	0.0211425	0.0770177
DOID:47	prostate disease	DOID:14228	oligospermia	0.0211377	0.0769535
DOID:3119	gastrointestinal system cancer	DOID:9119	acute myeloid leukemia	0.021014	0.0773352
DOID:9351	diabetes mellitus	DOID:182	calcinosis	0.0210057	0.0772807
DOID:865	vasculitis	DOID:10763	hypertension	0.020987	0.0772583
DOID:331	central nervous system disease	DOID:332	amyotrophic lateral sclerosis	0.0209766	0.0772205
DOID:114	heart disease	DOID:557	kidney disease	0.0209507	0.0772236
DOID:9351	diabetes mellitus	DOID:178	vascular disease	0.020946	0.0771584
DOID:417	hypersensitivity reaction type II disease	DOID:178	vascular disease	0.0208862	0.0772967
DOID:9206	Barrett's esophagus	DOID:13976	peptic esophagitis	0.0208721	0.07727
DOID:2355	anemia	DOID:417	hypersensitivity reaction type II disease	0.0208483	0.0772719
DOID:2394	ovarian cancer	DOID:1240	leukemia	0.0207988	0.0773669
DOID:0080001	bone disease	DOID:936	brain disease	0.0207741	0.0773523
DOID:0080001	bone disease	DOID:557	kidney disease	0.0207672	0.077294
DOID:409	liver disease	DOID:13580	cholestasis	0.0207029	0.0774258
DOID:224	transient cerebral ischemia	DOID:326	ischemia	0.0206336	0.0775518
DOID:2452	thrombophilia	DOID:4961	bone marrow disease	0.0206105	0.0775545
DOID:3587	pancreatic ductal carcinoma	DOID:170	endocrine gland cancer	0.02057	0.0775724
DOID:1749	squamous cell carcinoma	DOID:5093	thoracic cancer	0.0205087	0.0777109
DOID:1749	squamous cell carcinoma	DOID:1612	breast cancer	0.020452	0.0778241
DOID:1686	glaucoma	DOID:13550	angle-closure glaucoma	0.0204477	0.0777484
DOID:936	brain disease	DOID:3454	brain infarction	0.0203401	0.0779881
DOID:6713	cerebrovascular disease	DOID:341	peripheral vascular disease	0.0203042	0.078039
DOID:936	brain disease	DOID:557	kidney disease	0.020301	0.0779654
DOID:9993	hypoglycemia	DOID:26	pancreas disease	0.0202991	0.0778877
DOID:2224	hemorrhagic thrombocythemia	DOID:4960	bone marrow cancer	0.0202983	0.0778069
DOID:3119	gastrointestinal system cancer	DOID:4194	glucose metabolism disease	0.0202834	0.0777759
DOID:4988	alcoholic pancreatitis	DOID:26	pancreas disease	0.0202642	0.0777524
DOID:1949	cholecystitis	DOID:9446	cholangitis	0.0202404	0.0777376
DOID:7997	thyrotoxicosis	DOID:7188	autoimmune thyroiditis	0.0201804	0.077869
DOID:14067	Plasmodium falciparum malaria	DOID:12140	Chagas disease	0.0201727	0.0778101
DOID:13810	familial hypercholesterolemia	DOID:13809	familial combined hyperlipidemia	0.0201697	0.0777342
DOID:8466	retinal degeneration	DOID:2742	auditory system disease	0.0201563	0.0777034
DOID:3394	ischemic heart disease	DOID:10591	pre-eclampsia	0.020119	0.077739
DOID:1091	tooth disease	DOID:5295	intestinal disease	0.0200878	0.0777735
DOID:1074	kidney failure	DOID:1289	neurodegenerative disease	0.0200658	0.0777727
DOID:2789	parasitic protozoa infectious disease	DOID:0050597	intestinal schistosomiasis	0.0200631	0.0777047
DOID:1875	impotence	DOID:4762	vasculogenic impotence	0.0200501	0.0776571
DOID:9351	diabetes mellitus	DOID:3119	gastrointestinal system cancer	0.0200344	0.0776298
DOID:409	liver disease	DOID:3388	periodontal disease	0.0199989	0.0776727
DOID:848	arthritis	DOID:331	central nervous system disease	0.0199308	0.077811
DOID:13089	intracranial arterial disease	DOID:3407	carotid artery disease	0.0198776	0.0779215
DOID:2055	post-traumatic stress disorder	DOID:2030	anxiety disorder	0.019817	0.0780561
DOID:9261	nasopharynx carcinoma	DOID:3908	non-small cell lung carcinoma	0.0198127	0.0779862
DOID:1240	leukemia	DOID:170	endocrine gland cancer	0.0196921	0.0783488
DOID:12365	malaria	DOID:9146	visceral leishmaniasis	0.0196835	0.0782936
DOID:2825	nose disease	DOID:3083	chronic obstructive pulmonary disease	0.0196179	0.0784388
DOID:170	endocrine gland cancer	DOID:3969	papillary thyroid carcinoma	0.0195499	0.0786238
DOID:1289	neurodegenerative disease	DOID:10763	hypertension	0.0194304	0.0789684
DOID:114	heart disease	DOID:341	peripheral vascular disease	0.0194219	0.0789127
DOID:1247	blood coagulation disease	DOID:9074	systemic lupus erythematosus	0.019391	0.0789307
DOID:1074	kidney failure	DOID:178	vascular disease	0.0193215	0.0791028
DOID:3119	gastrointestinal system cancer	DOID:331	central nervous system disease	0.0193206	0.079022
DOID:3527	cerebral arterial disease	DOID:3407	carotid artery disease	0.0192933	0.0790346
DOID:1749	squamous cell carcinoma	DOID:2671	transitional cell carcinoma	0.0192298	0.0791841
DOID:12466	secondary hyperparathyroidism	DOID:26	pancreas disease	0.0192153	0.0791463
DOID:1508	candidiasis	DOID:2058	chronic mucocutaneous candidiasis	0.0191335	0.0793946
DOID:11476	osteoporosis	DOID:8398	osteoarthritis	0.0190866	0.0794776
DOID:680	tauopathy	DOID:5679	retinal disease	0.0190747	0.0794323
DOID:3394	ischemic heart disease	DOID:4248	coronary stenosis	0.019067	0.0793736
DOID:331	central nervous system disease	DOID:37	skin disease	0.0190611	0.079315
DOID:10652	Alzheimer's disease	DOID:5679	retinal disease	0.0190469	0.0793146
DOID:680	tauopathy	DOID:1826	epilepsy syndrome	0.0190378	0.0792624
DOID:10652	Alzheimer's disease	DOID:1826	epilepsy syndrome	0.0190281	0.0792052
DOID:8670	eating disorder	DOID:1059	intellectual disability	0.0190172	0.0791553
DOID:5295	intestinal disease	DOID:2237	hepatitis	0.0190014	0.0791386
DOID:3393	coronary heart disease	DOID:331	central nervous system disease	0.0189701	0.0791952
DOID:3044	food allergy	DOID:1205	hypersensitivity reaction type I disease	0.018966	0.0791321
DOID:11077	brucellosis	DOID:399	tuberculosis	0.0188756	0.0794175
DOID:680	tauopathy	DOID:332	amyotrophic lateral sclerosis	0.0188486	0.079449
DOID:883	parasitic helminthiasis infectious disease	DOID:12211	filarial elephantiasis	0.0188481	0.0793673
DOID:10652	Alzheimer's disease	DOID:332	amyotrophic lateral sclerosis	0.0188253	0.079371
DOID:2320	obstructive lung disease	DOID:11162	respiratory failure	0.0188042	0.0793583
DOID:2320	obstructive lung disease	DOID:1289	neurodegenerative disease	0.0188025	0.0792821
DOID:0080001	bone disease	DOID:680	tauopathy	0.018791	0.0792449
DOID:0080001	bone disease	DOID:10652	Alzheimer's disease	0.0187632	0.0792764
DOID:6432	pulmonary hypertension	DOID:10763	hypertension	0.0187587	0.0792086
DOID:13089	intracranial arterial disease	DOID:3454	brain infarction	0.018737	0.0792135
DOID:1508	candidiasis	DOID:12053	cryptococcosis	0.018703	0.0792633
DOID:11054	urinary bladder cancer	DOID:1240	leukemia	0.0186219	0.0795015
DOID:83	cataract	DOID:5614	eye disease	0.0185565	0.0796741
DOID:14067	Plasmodium falciparum malaria	DOID:9111	cutaneous leishmaniasis	0.0185563	0.0795931
DOID:11247	disseminated intravascular coagulation	DOID:2213	hemorrhagic disease	0.0185494	0.0795325
DOID:1686	glaucoma	DOID:8947	diabetic retinopathy	0.0185409	0.0794944
DOID:417	hypersensitivity reaction type II disease	DOID:0080001	bone disease	0.018519	0.0794848
DOID:2868	arterial occlusive disease	DOID:331	central nervous system disease	0.0184905	0.079538
DOID:1459	hypothyroidism	DOID:7188	autoimmune thyroiditis	0.0184131	0.0797449
DOID:2316	brain ischemia	DOID:10591	pre-eclampsia	0.0182984	0.0801122
DOID:3527	cerebral arterial disease	DOID:3454	brain infarction	0.0182764	0.0801121
DOID:2316	brain ischemia	DOID:3394	ischemic heart disease	0.0182588	0.0800969
DOID:3388	periodontal disease	DOID:3087	gingivitis	0.0181028	0.0806381
DOID:440	neuromuscular disease	DOID:3342	bone inflammation disease	0.0181025	0.0805589
DOID:2394	ovarian cancer	DOID:4001	ovarian carcinoma	0.0180621	0.0806479
DOID:854	collagen disease	DOID:3342	bone inflammation disease	0.0180586	0.0805799
DOID:170	endocrine gland cancer	DOID:120	female reproductive organ cancer	0.0180529	0.0805261
DOID:2320	obstructive lung disease	DOID:178	vascular disease	0.0180422	0.0804885
DOID:2349	arteriosclerosis	DOID:331	central nervous system disease	0.0179761	0.0806633
DOID:1227	neutropenia	DOID:74	hematopoietic system disease	0.0179614	0.0806456
DOID:2868	arterial occlusive disease	DOID:865	vasculitis	0.0178464	0.081052
DOID:3620	central nervous system cancer	DOID:3119	gastrointestinal system cancer	0.0178086	0.0811189
DOID:1289	neurodegenerative disease	DOID:74	hematopoietic system disease	0.017758	0.0812475
DOID:417	hypersensitivity reaction type II disease	DOID:11335	sarcoidosis	0.0177444	0.0812183
DOID:936	brain disease	DOID:11832	visual epilepsy	0.0177268	0.0812141
DOID:6713	cerebrovascular disease	DOID:3213	demyelinating disease	0.0176566	0.0814239
DOID:381	arthropathy	DOID:8398	osteoarthritis	0.0176487	0.0813787
DOID:13564	aspergillosis	DOID:14262	oral candidiasis	0.017618	0.0814131
DOID:6713	cerebrovascular disease	DOID:5614	eye disease	0.0175821	0.0814861
DOID:12336	male infertility	DOID:780	placenta disease	0.0175407	0.0815996
DOID:2018	hyperinsulinism	DOID:13543	hyperparathyroidism	0.0175356	0.0815455
DOID:120	female reproductive organ cancer	DOID:3093	nervous system cancer	0.0175193	0.0815312
DOID:2349	arteriosclerosis	DOID:865	vasculitis	0.0174983	0.0815227
DOID:3620	central nervous system cancer	DOID:2531	hematologic cancer	0.0174712	0.0815577
DOID:1749	squamous cell carcinoma	DOID:2531	hematologic cancer	0.0174639	0.081503
DOID:5093	thoracic cancer	DOID:9119	acute myeloid leukemia	0.0174632	0.0814227
DOID:1612	breast cancer	DOID:9119	acute myeloid leukemia	0.0174325	0.0814626
DOID:10608	celiac disease	DOID:2048	autoimmune hepatitis	0.0174193	0.0814503
DOID:0080001	bone disease	DOID:850	lung disease	0.0174133	0.0813969
DOID:3119	gastrointestinal system cancer	DOID:8538	reticulosarcoma	0.0173955	0.0813876
DOID:12365	malaria	DOID:0050597	intestinal schistosomiasis	0.0173764	0.0813902
DOID:3310	atopic dermatitis	DOID:3042	allergic contact dermatitis	0.0172595	0.0818286
DOID:1091	tooth disease	DOID:0050589	inflammatory bowel disease	0.0172009	0.081999
DOID:1936	atherosclerosis	DOID:865	vasculitis	0.017199	0.0819228
DOID:1091	tooth disease	DOID:5082	liver cirrhosis	0.0171621	0.0820205
DOID:2213	hemorrhagic disease	DOID:2228	thrombocytosis	0.0171259	0.0820771
DOID:2377	multiple sclerosis	DOID:6713	cerebrovascular disease	0.0170869	0.0821735
DOID:13641	exfoliation syndrome	DOID:13141	uveitis	0.0170764	0.0821402
DOID:1936	atherosclerosis	DOID:331	central nervous system disease	0.0170729	0.0820749
DOID:12987	agranulocytosis	DOID:999	eosinophilia	0.0170729	0.0819951
DOID:178	vascular disease	DOID:74	hematopoietic system disease	0.0170712	0.0819194
DOID:341	peripheral vascular disease	DOID:3455	cerebrovascular accident	0.0170706	0.0818429
DOID:4535	hypotrichosis	DOID:37	skin disease	0.0170379	0.0819021
DOID:14330	Parkinson's disease	DOID:3213	demyelinating disease	0.0170237	0.0818838
DOID:680	tauopathy	DOID:114	heart disease	0.0169959	0.0819197
DOID:11502	mitral valve insufficiency	DOID:4079	heart valve disease	0.0169951	0.0818425
DOID:1307	dementia	DOID:331	central nervous system disease	0.016977	0.0818475
DOID:112	esophageal varix	DOID:799	varicose veins	0.0169626	0.0818419
DOID:10652	Alzheimer's disease	DOID:114	heart disease	0.0169521	0.0818025
DOID:1059	intellectual disability	DOID:12129	bulimia nervosa	0.016926	0.0818325
DOID:3342	bone inflammation disease	DOID:1289	neurodegenerative disease	0.0169203	0.0817779
DOID:10113	trypanosomiasis	DOID:9065	leishmaniasis	0.016913	0.0817435
DOID:850	lung disease	DOID:114	heart disease	0.0169005	0.0817169
DOID:848	arthritis	DOID:854	collagen disease	0.0168508	0.0818476
DOID:11054	urinary bladder cancer	DOID:120	female reproductive organ cancer	0.0168356	0.0818285
DOID:3042	allergic contact dermatitis	DOID:37	skin disease	0.016733	0.0821962
DOID:883	parasitic helminthiasis infectious disease	DOID:1394	urinary schistosomiasis	0.0167301	0.08213
DOID:824	periodontitis	DOID:3087	gingivitis	0.016728	0.0820611
DOID:3388	periodontal disease	DOID:5295	intestinal disease	0.0167059	0.0820706
DOID:12336	male infertility	DOID:1100	ovarian disease	0.0166882	0.0820677
DOID:9500	leukocyte disease	DOID:350	mastocytosis	0.016677	0.0820267
DOID:8466	retinal degeneration	DOID:1289	neurodegenerative disease	0.0166746	0.08196
DOID:7682	ruptured aortic aneurysm	DOID:2403	aneurysm disease	0.0166568	0.0819857
DOID:440	neuromuscular disease	DOID:848	arthritis	0.0166497	0.0819316
DOID:2377	multiple sclerosis	DOID:14330	Parkinson's disease	0.016608	0.0820323
DOID:1612	breast cancer	DOID:3008	invasive ductal carcinoma	0.0165757	0.0820682
DOID:450	myotonic disease	DOID:2106	Thomsen disease	0.0165631	0.0820426
DOID:1657	ventricular septal defect	DOID:1682	congenital heart defect	0.0165606	0.0819773
DOID:0080001	bone disease	DOID:676	juvenile rheumatoid arthritis	0.0165453	0.0819707
DOID:2228	thrombocytosis	DOID:1588	thrombocytopenia	0.0165144	0.0820189
DOID:417	hypersensitivity reaction type II disease	DOID:12306	vitiligo	0.0165088	0.0819679
DOID:14069	cerebral malaria	DOID:9065	leishmaniasis	0.0165014	0.0819189
DOID:3342	bone inflammation disease	DOID:178	vascular disease	0.0164985	0.081854
DOID:6364	migraine	DOID:6713	cerebrovascular disease	0.0164931	0.0817996
DOID:5093	thoracic cancer	DOID:3008	invasive ductal carcinoma	0.0164904	0.0817359
DOID:2773	contact dermatitis	DOID:2772	irritant dermatitis	0.0164879	0.0816676
DOID:2921	glomerulonephritis	DOID:10976	membranous glomerulonephritis	0.0164547	0.0817326
DOID:0080001	bone disease	DOID:4194	glucose metabolism disease	0.0164423	0.0817113
DOID:670	amphetamine abuse	DOID:1574	alcohol abuse	0.0164365	0.0816573
DOID:850	lung disease	DOID:557	kidney disease	0.0164096	0.0817016
DOID:0080001	bone disease	DOID:10763	hypertension	0.0163936	0.0816888
DOID:178	vascular disease	DOID:6000	congestive heart failure	0.016311	0.0820233
DOID:936	brain disease	DOID:10763	hypertension	0.0162915	0.082028
DOID:9351	diabetes mellitus	DOID:0080001	bone disease	0.0162621	0.0820624
DOID:0050589	inflammatory bowel disease	DOID:2237	hepatitis	0.0162053	0.0822467
DOID:1227	neutropenia	DOID:999	eosinophilia	0.0161955	0.0822056
DOID:178	vascular disease	DOID:3454	brain infarction	0.0161801	0.0821877
DOID:456	ascariasis	DOID:883	parasitic helminthiasis infectious disease	0.0161282	0.0823055
DOID:3119	gastrointestinal system cancer	DOID:3908	non-small cell lung carcinoma	0.016123	0.0822458
DOID:2560	morphine dependence	DOID:2559	opiate dependence	0.0161025	0.0822799
DOID:12030	panuveitis	DOID:1417	choroid disease	0.0160699	0.0823528
DOID:680	tauopathy	DOID:557	kidney disease	0.0160589	0.0823367
DOID:114	heart disease	DOID:4248	coronary stenosis	0.0160582	0.0822625
DOID:10652	Alzheimer's disease	DOID:557	kidney disease	0.0160282	0.0823195
DOID:1909	melanoma	DOID:3119	gastrointestinal system cancer	0.0159733	0.0824899
DOID:850	lung disease	DOID:4481	allergic rhinitis	0.0159227	0.0826479
DOID:3407	carotid artery disease	DOID:10763	hypertension	0.0159164	0.0826004
DOID:331	central nervous system disease	DOID:65	connective tissue disease	0.0158967	0.0826311
DOID:2868	arterial occlusive disease	DOID:3407	carotid artery disease	0.0158506	0.0827923
DOID:6590	spondylitis	DOID:381	arthropathy	0.0158315	0.0828081
DOID:9155	mucocutaneous leishmaniasis	DOID:9146	visceral leishmaniasis	0.0158139	0.0828092
DOID:409	liver disease	DOID:76	stomach disease	0.0158046	0.0827681
DOID:326	ischemia	DOID:5844	myocardial infarction	0.0157868	0.0827738
DOID:4194	glucose metabolism disease	DOID:114	heart disease	0.0157566	0.0828253
DOID:3620	central nervous system cancer	DOID:5093	thoracic cancer	0.0157086	0.0829698
DOID:13241	Behcet's disease	DOID:9074	systemic lupus erythematosus	0.0156964	0.0829562
DOID:3393	coronary heart disease	DOID:12930	dilated cardiomyopathy	0.0156954	0.0828869
DOID:3620	central nervous system cancer	DOID:1612	breast cancer	0.0156807	0.0828806
DOID:5419	schizophrenia	DOID:1742	drug psychosis	0.0156763	0.0828215
DOID:409	liver disease	DOID:331	central nervous system disease	0.0156755	0.0827489
DOID:417	hypersensitivity reaction type II disease	DOID:557	kidney disease	0.0156746	0.0826764
DOID:178	vascular disease	DOID:5614	eye disease	0.0156631	0.0826712
DOID:229	female reproductive system disease	DOID:331	central nervous system disease	0.015662	0.0826007
DOID:8692	myeloid leukemia	DOID:120	female reproductive organ cancer	0.0156498	0.0825684
DOID:417	hypersensitivity reaction type II disease	DOID:114	heart disease	0.0156031	0.0827174
DOID:9500	leukocyte disease	DOID:2355	anemia	0.0156	0.0826552
DOID:635	acquired immunodeficiency syndrome	DOID:1883	hepatitis C	0.0155892	0.0826356
DOID:5082	liver cirrhosis	DOID:13580	cholestasis	0.0155663	0.0826585
DOID:850	lung disease	DOID:936	brain disease	0.0155519	0.0826426
DOID:557	kidney disease	DOID:10763	hypertension	0.0155405	0.0826294
DOID:5844	myocardial infarction	DOID:6000	congestive heart failure	0.0155212	0.0826387
DOID:9351	diabetes mellitus	DOID:114	heart disease	0.0155138	0.0826085
DOID:409	liver disease	DOID:14018	alcoholic liver cirrhosis	0.0155091	0.0825549
DOID:824	periodontitis	DOID:409	liver disease	0.0154935	0.0825391
DOID:1074	kidney failure	DOID:114	heart disease	0.0153781	0.0829838
DOID:120	female reproductive organ cancer	DOID:0060058	lymphoma	0.0153719	0.0829462
DOID:848	arthritis	DOID:1289	neurodegenerative disease	0.0152992	0.0831953
DOID:4483	rhinitis	DOID:3083	chronic obstructive pulmonary disease	0.0151763	0.0836956
DOID:9553	adrenal gland disease	DOID:26	pancreas disease	0.0151239	0.0839052
DOID:865	vasculitis	DOID:3049	Churg-Strauss syndrome	0.0151192	0.083849
DOID:8805	intermediate coronary syndrome	DOID:3394	ischemic heart disease	0.0151093	0.0838196
DOID:3363	coronary arteriosclerosis	DOID:865	vasculitis	0.0151068	0.0837565
DOID:1176	bronchial disease	DOID:11162	respiratory failure	0.0150936	0.083738
DOID:10113	trypanosomiasis	DOID:883	parasitic helminthiasis infectious disease	0.0150601	0.0838192
DOID:2349	arteriosclerosis	DOID:3407	carotid artery disease	0.0150581	0.0837607
DOID:1074	kidney failure	DOID:0080001	bone disease	0.0150114	0.0839227
DOID:3620	central nervous system cancer	DOID:1240	leukemia	0.0149967	0.0839218
DOID:114	heart disease	DOID:4079	heart valve disease	0.0149653	0.0839956
DOID:5844	myocardial infarction	DOID:4248	coronary stenosis	0.0149622	0.0839371
DOID:170	endocrine gland cancer	DOID:3953	adrenal gland cancer	0.0149508	0.0839159
DOID:3369	peripheral primitive neuroectodermal tumor	DOID:769	neuroblastoma	0.0149072	0.0840354
DOID:848	arthritis	DOID:178	vascular disease	0.0148602	0.0841998
DOID:2841	asthma	DOID:11162	respiratory failure	0.0148513	0.084174
DOID:2320	obstructive lung disease	DOID:4481	allergic rhinitis	0.0148247	0.0842427
DOID:2527	nephrosis	DOID:557	kidney disease	0.0148191	0.0841914
DOID:229	female reproductive system disease	DOID:14228	oligospermia	0.0147869	0.0842828
DOID:178	vascular disease	DOID:37	skin disease	0.0147782	0.0842509
DOID:418	systemic scleroderma	DOID:0080001	bone disease	0.0147754	0.0841838
DOID:13564	aspergillosis	DOID:11339	pneumocystosis	0.0147734	0.0841186
DOID:3394	ischemic heart disease	DOID:12930	dilated cardiomyopathy	0.0147626	0.0840896
DOID:263	kidney cancer	DOID:3119	gastrointestinal system cancer	0.0147556	0.08405
DOID:2320	obstructive lung disease	DOID:0080001	bone disease	0.0147302	0.0840885
DOID:4194	glucose metabolism disease	DOID:936	brain disease	0.0147044	0.0841349
DOID:10976	membranous glomerulonephritis	DOID:10952	nephritis	0.0146988	0.0840971
DOID:12140	Chagas disease	DOID:9065	leishmaniasis	0.0146921	0.0840516
DOID:1936	atherosclerosis	DOID:3407	carotid artery disease	0.0146598	0.0841144
DOID:1273	respiratory syncytial virus infectious disease	DOID:526	Human immunodeficiency virus infectious disease	0.0146429	0.0841213
DOID:5773	oral submucous fibrosis	DOID:403	mouth disease	0.0146322	0.0841011
DOID:3388	periodontal disease	DOID:5082	liver cirrhosis	0.0145777	0.0843057
DOID:331	central nervous system disease	DOID:7148	rheumatoid arthritis	0.0145771	0.0842341
DOID:3133	acute porphyria	DOID:13269	hereditary coproporphyria	0.0145712	0.0841948
DOID:417	hypersensitivity reaction type II disease	DOID:4961	bone marrow disease	0.0145562	0.0841998
DOID:0050589	inflammatory bowel disease	DOID:3388	periodontal disease	0.0145444	0.0841753
DOID:9351	diabetes mellitus	DOID:936	brain disease	0.014531	0.0841648
DOID:2403	aneurysm disease	DOID:10763	hypertension	0.014527	0.0841057
DOID:4194	glucose metabolism disease	DOID:557	kidney disease	0.0145161	0.0840874
DOID:417	hypersensitivity reaction type II disease	DOID:936	brain disease	0.0145057	0.0840718
DOID:5093	thoracic cancer	DOID:8538	reticulosarcoma	0.014499	0.0840285
DOID:8538	reticulosarcoma	DOID:1612	breast cancer	0.0144743	0.0840803
DOID:4194	glucose metabolism disease	DOID:5093	thoracic cancer	0.0144542	0.0841182
DOID:1289	neurodegenerative disease	DOID:37	skin disease	0.014453	0.084056
DOID:5614	eye disease	DOID:3213	demyelinating disease	0.014446	0.0840207
DOID:341	peripheral vascular disease	DOID:10591	pre-eclampsia	0.0144199	0.0840904
DOID:4194	glucose metabolism disease	DOID:1612	breast cancer	0.0143916	0.0841651
DOID:854	collagen disease	DOID:7148	rheumatoid arthritis	0.0143601	0.0842457
DOID:6713	cerebrovascular disease	DOID:865	vasculitis	0.0143433	0.0842592
DOID:9351	diabetes mellitus	DOID:557	kidney disease	0.0143258	0.084277
DOID:178	vascular disease	DOID:13241	Behcet's disease	0.0143247	0.0842099
DOID:1342	congenital hypoplastic anemia	DOID:583	hemolytic anemia	0.0143191	0.0841652
DOID:13543	hyperparathyroidism	DOID:50	thyroid gland disease	0.014278	0.0842806
DOID:2018	hyperinsulinism	DOID:12466	secondary hyperparathyroidism	0.0142571	0.0842991
DOID:1074	kidney failure	DOID:936	brain disease	0.0142501	0.0842622
DOID:9351	diabetes mellitus	DOID:5093	thoracic cancer	0.0142405	0.0842329
DOID:2320	obstructive lung disease	DOID:114	heart disease	0.0142209	0.0842481
DOID:13089	intracranial arterial disease	DOID:936	brain disease	0.0142038	0.0842555
DOID:9351	diabetes mellitus	DOID:1612	breast cancer	0.0141786	0.084314
DOID:14115	toxic shock syndrome	DOID:399	tuberculosis	0.0141628	0.0843172
DOID:9667	placental abruption	DOID:780	placenta disease	0.0141608	0.0842591
DOID:5295	intestinal disease	DOID:76	stomach disease	0.014131	0.0843463
DOID:440	neuromuscular disease	DOID:65	connective tissue disease	0.0141282	0.0842935
DOID:11077	brucellosis	DOID:2957	pulmonary tuberculosis	0.0141142	0.0842992
DOID:1749	squamous cell carcinoma	DOID:1240	leukemia	0.0140865	0.0843734
DOID:2377	multiple sclerosis	DOID:5614	eye disease	0.0140458	0.0844958
DOID:2237	hepatitis	DOID:12236	primary biliary cirrhosis	0.0140189	0.0845587
DOID:6364	migraine	DOID:3455	cerebrovascular accident	0.0139983	0.0845904
DOID:13258	typhoid fever	DOID:399	tuberculosis	0.0139879	0.0845705
DOID:865	vasculitis	DOID:114	heart disease	0.013985	0.0845185
DOID:0080001	bone disease	DOID:74	hematopoietic system disease	0.013962	0.0845611
DOID:3394	ischemic heart disease	DOID:331	central nervous system disease	0.0139613	0.0844933
DOID:615	leukopenia	DOID:1247	blood coagulation disease	0.0139374	0.0845425
DOID:440	neuromuscular disease	DOID:331	central nervous system disease	0.0139241	0.0845319
DOID:1307	dementia	DOID:1289	neurodegenerative disease	0.0139173	0.0844971
DOID:529	blepharospasm	DOID:530	eyelid disease	0.013913	0.0844513
DOID:5093	thoracic cancer	DOID:331	central nervous system disease	0.0139111	0.084394
DOID:5614	eye disease	DOID:11830	myopia	0.0139013	0.0843735
DOID:3119	gastrointestinal system cancer	DOID:1289	neurodegenerative disease	0.0139009	0.0843038
DOID:14067	Plasmodium falciparum malaria	DOID:9146	visceral leishmaniasis	0.0138797	0.0843487
DOID:8692	myeloid leukemia	DOID:3093	nervous system cancer	0.0138797	0.084279
DOID:9455	lipid storage disease	DOID:2747	glycogen storage disease	0.0138767	0.0842254
DOID:1067	open-angle glaucoma	DOID:13550	angle-closure glaucoma	0.0138571	0.0842527
DOID:3363	coronary arteriosclerosis	DOID:331	central nervous system disease	0.0138548	0.084195
DOID:1612	breast cancer	DOID:331	central nervous system disease	0.01385	0.0841507
DOID:2320	obstructive lung disease	DOID:557	kidney disease	0.0138225	0.0842238
DOID:3455	cerebrovascular accident	DOID:3213	demyelinating disease	0.013822	0.0841571
DOID:2868	arterial occlusive disease	DOID:1289	neurodegenerative disease	0.0137851	0.0842716
DOID:1080	filariasis	DOID:0050597	intestinal schistosomiasis	0.0137757	0.084249
DOID:2921	glomerulonephritis	DOID:10966	lipoid nephrosis	0.0137657	0.0842322
DOID:3363	coronary arteriosclerosis	DOID:12930	dilated cardiomyopathy	0.0137429	0.0842693
DOID:5223	infertility	DOID:780	placenta disease	0.0137429	0.0841995
DOID:3347	osteosarcoma	DOID:3247	rhabdomyosarcoma	0.0137293	0.0842002
DOID:3527	cerebral arterial disease	DOID:936	brain disease	0.0137126	0.0842025
DOID:1074	kidney failure	DOID:3021	acute kidney failure	0.0137104	0.084147
DOID:987	alopecia	DOID:37	skin disease	0.0137083	0.0840883
DOID:1067	open-angle glaucoma	DOID:8947	diabetic retinopathy	0.0136912	0.0841014
DOID:421	hair disease	DOID:2723	dermatitis	0.0136892	0.0840404
DOID:3393	coronary heart disease	DOID:1289	neurodegenerative disease	0.0136683	0.0840947
DOID:5844	myocardial infarction	DOID:10591	pre-eclampsia	0.0136669	0.0840304
DOID:5093	thoracic cancer	DOID:3908	non-small cell lung carcinoma	0.0136271	0.084175
DOID:14067	Plasmodium falciparum malaria	DOID:0050597	intestinal schistosomiasis	0.0136142	0.0841716
DOID:1612	breast cancer	DOID:3908	non-small cell lung carcinoma	0.0135946	0.0841977
DOID:1555	urticaria	DOID:11713	diabetic angiopathy	0.0135858	0.0841721
DOID:6713	cerebrovascular disease	DOID:8725	vascular dementia	0.013557	0.0842662
DOID:14654	prostatitis	DOID:47	prostate disease	0.013543	0.0842717
DOID:2043	hepatitis B	DOID:526	Human immunodeficiency virus infectious disease	0.0135343	0.0842535
DOID:0060061	cutaneous T cell lymphoma	DOID:0060058	lymphoma	0.0135319	0.0842026
DOID:229	female reproductive system disease	DOID:47	prostate disease	0.0135207	0.0841976
DOID:403	mouth disease	DOID:2237	hepatitis	0.0135015	0.0842259
DOID:417	hypersensitivity reaction type II disease	DOID:850	lung disease	0.0135009	0.0841606
DOID:1909	melanoma	DOID:5093	thoracic cancer	0.0134755	0.084228
DOID:2349	arteriosclerosis	DOID:1289	neurodegenerative disease	0.0134728	0.0841758
DOID:74	hematopoietic system disease	DOID:557	kidney disease	0.0134545	0.0842236
DOID:5614	eye disease	DOID:3455	cerebrovascular accident	0.0134502	0.0841738
DOID:1926	Gaucher's disease	DOID:14504	Niemann-Pick disease	0.0134276	0.0842354
DOID:1909	melanoma	DOID:1612	breast cancer	0.0134203	0.0842003
DOID:2742	auditory system disease	DOID:9849	Meniere's disease	0.0133862	0.0842291
DOID:2742	auditory system disease	DOID:9848	endolymphatic hydrops	0.0133862	0.0842291
DOID:2377	multiple sclerosis	DOID:3455	cerebrovascular accident	0.013385	0.0841659
DOID:3393	coronary heart disease	DOID:341	peripheral vascular disease	0.0133665	0.0841908
DOID:0080001	bone disease	DOID:7147	ankylosing spondylitis	0.0133408	0.0842714
DOID:4194	glucose metabolism disease	DOID:2531	hematologic cancer	0.013339	0.0842082
DOID:440	neuromuscular disease	DOID:7148	rheumatoid arthritis	0.0133178	0.0842468
DOID:9446	cholangitis	DOID:1852	intrahepatic cholestasis	0.0133069	0.0842377
DOID:1749	squamous cell carcinoma	DOID:120	female reproductive organ cancer	0.0133065	0.0841731
DOID:331	central nervous system disease	DOID:1176	bronchial disease	0.0132799	0.084222
DOID:9540	vascular skin disease	DOID:178	vascular disease	0.0132645	0.0842371
DOID:2394	ovarian cancer	DOID:170	endocrine gland cancer	0.0132571	0.0842104
DOID:2316	brain ischemia	DOID:5844	myocardial infarction	0.0132438	0.0842151
DOID:9351	diabetes mellitus	DOID:2531	hematologic cancer	0.0131991	0.084397
DOID:883	parasitic helminthiasis infectious disease	DOID:12140	Chagas disease	0.0131346	0.0846907
DOID:2452	thrombophilia	DOID:9074	systemic lupus erythematosus	0.0131263	0.0846677
DOID:1949	cholecystitis	DOID:0000000	gallbladder disease	0.0131022	0.0847152
DOID:326	ischemia	DOID:341	peripheral vascular disease	0.0130907	0.0847074
DOID:2320	obstructive lung disease	DOID:936	brain disease	0.0130716	0.0847516
DOID:883	parasitic helminthiasis infectious disease	DOID:9111	cutaneous leishmaniasis	0.0130661	0.0847119
DOID:9500	leukocyte disease	DOID:2452	thrombophilia	0.013054	0.0847033
DOID:4889	lymph node tuberculosis	DOID:106	pleural tuberculosis	0.013048	0.0846693
DOID:936	brain disease	DOID:74	hematopoietic system disease	0.0130423	0.0846322
DOID:2841	asthma	DOID:331	central nervous system disease	0.0130402	0.0845744
DOID:5295	intestinal disease	DOID:331	central nervous system disease	0.0130372	0.0845223
DOID:2723	dermatitis	DOID:8506	bullous pemphigoid	0.0130263	0.0845187
DOID:12574	posterior uveitis	DOID:13141	uveitis	0.0130164	0.0845
DOID:1091	tooth disease	DOID:3087	gingivitis	0.0130038	0.0845036
DOID:5614	eye disease	DOID:10003	sensorineural hearing loss	0.013	0.084458
DOID:13001	carotid stenosis	DOID:3454	brain infarction	0.0129768	0.0845329
DOID:824	periodontitis	DOID:5295	intestinal disease	0.0129689	0.0845063
DOID:50	thyroid gland disease	DOID:4989	pancreatitis	0.0129641	0.0844704
DOID:864	phlebitis	DOID:112	esophageal varix	0.012928	0.0845257
DOID:112	esophageal varix	DOID:3875	thrombophlebitis	0.012928	0.0845257
DOID:3371	chondrosarcoma	DOID:3347	osteosarcoma	0.012874	0.0847524
DOID:3363	coronary arteriosclerosis	DOID:3407	carotid artery disease	0.0128691	0.0847155
DOID:114	heart disease	DOID:74	hematopoietic system disease	0.0128597	0.0846874
DOID:1936	atherosclerosis	DOID:1289	neurodegenerative disease	0.0128408	0.0847183
DOID:3342	bone inflammation disease	DOID:114	heart disease	0.0128329	0.0846989
DOID:14069	cerebral malaria	DOID:10113	trypanosomiasis	0.0128207	0.0846968
DOID:2772	irritant dermatitis	DOID:3042	allergic contact dermatitis	0.0128075	0.0847088
DOID:1496	echinococcosis	DOID:0050597	intestinal schistosomiasis	0.0128015	0.0846784
DOID:11476	osteoporosis	DOID:331	central nervous system disease	0.0127863	0.0847045
DOID:1168	familial hyperlipidemia	DOID:9455	lipid storage disease	0.0127779	0.0846852
DOID:4481	allergic rhinitis	DOID:1176	bronchial disease	0.0127643	0.0846987
DOID:8506	bullous pemphigoid	DOID:8505	dermatitis herpetiformis	0.0127351	0.0848077
DOID:2841	asthma	DOID:4481	allergic rhinitis	0.012708	0.0849
DOID:850	lung disease	DOID:680	tauopathy	0.0127043	0.0848509
DOID:8466	retinal degeneration	DOID:936	brain disease	0.0127034	0.0847871
DOID:10652	Alzheimer's disease	DOID:850	lung disease	0.0126864	0.0848231
DOID:4889	lymph node tuberculosis	DOID:9861	miliary tuberculosis	0.0126856	0.0847671
DOID:2868	arterial occlusive disease	DOID:2403	aneurysm disease	0.0126296	0.0849984
DOID:1909	melanoma	DOID:2531	hematologic cancer	0.0126071	0.085056
DOID:4194	glucose metabolism disease	DOID:526	Human immunodeficiency virus infectious disease	0.0125885	0.0850925
DOID:1307	dementia	DOID:4194	glucose metabolism disease	0.0125722	0.0851056
DOID:9970	obesity	DOID:1837	diabetic ketoacidosis	0.0125709	0.0850458
DOID:409	liver disease	DOID:5353	colonic disease	0.012557	0.0850612
DOID:418	systemic scleroderma	DOID:10608	celiac disease	0.0125329	0.0851332
DOID:331	central nervous system disease	DOID:2531	hematologic cancer	0.0125327	0.0850689
DOID:0080001	bone disease	DOID:5614	eye disease	0.0125104	0.0851268
DOID:216	dental caries	DOID:1091	tooth disease	0.0125096	0.085068
DOID:3119	gastrointestinal system cancer	DOID:178	vascular disease	0.0124829	0.0851452
DOID:4051	alveolar rhabdomyosarcoma	DOID:3246	embryonal rhabdomyosarcoma	0.0124723	0.0851427
DOID:9351	diabetes mellitus	DOID:526	Human immunodeficiency virus infectious disease	0.0124439	0.0852444
DOID:1025	tuberculoid leprosy	DOID:10887	lepromatous leprosy	0.0124413	0.0851957
DOID:1307	dementia	DOID:9351	diabetes mellitus	0.0124239	0.085224
DOID:2055	post-traumatic stress disorder	DOID:4964	neurotic disorder	0.0124174	0.0851846
DOID:3908	non-small cell lung carcinoma	DOID:2531	hematologic cancer	0.0124164	0.0851261
DOID:9500	leukocyte disease	DOID:4961	bone marrow disease	0.0123959	0.0851859
DOID:5295	intestinal disease	DOID:2044	drug-induced hepatitis	0.0123697	0.0852832
DOID:0080001	bone disease	DOID:37	skin disease	0.0123648	0.0852462
DOID:12176	goiter	DOID:7998	hyperthyroidism	0.012348	0.0852774
DOID:2349	arteriosclerosis	DOID:2403	aneurysm disease	0.0123406	0.0852711
DOID:2394	ovarian cancer	DOID:3093	nervous system cancer	0.0123351	0.0852372
DOID:3119	gastrointestinal system cancer	DOID:4960	bone marrow cancer	0.0122993	0.0853609
DOID:1407	anterior uveitis	DOID:1417	choroid disease	0.0122916	0.0853354
DOID:417	hypersensitivity reaction type II disease	DOID:65	connective tissue disease	0.0122873	0.0853
DOID:865	vasculitis	DOID:3455	cerebrovascular accident	0.0122688	0.0853448
DOID:229	female reproductive system disease	DOID:178	vascular disease	0.0122509	0.0853735
DOID:2355	anemia	DOID:2213	hemorrhagic disease	0.012232	0.0854235
DOID:263	kidney cancer	DOID:5093	thoracic cancer	0.0122295	0.0853737
DOID:5082	liver cirrhosis	DOID:76	stomach disease	0.0122209	0.0853521
DOID:9741	biliary tract disease	DOID:2237	hepatitis	0.0122191	0.0852956
DOID:4194	glucose metabolism disease	DOID:680	tauopathy	0.0121943	0.0853728
DOID:1074	kidney failure	DOID:850	lung disease	0.0121881	0.0853437
DOID:1289	neurodegenerative disease	DOID:65	connective tissue disease	0.0121757	0.0853518
DOID:263	kidney cancer	DOID:1612	breast cancer	0.0121657	0.0853288
DOID:4194	glucose metabolism disease	DOID:10652	Alzheimer's disease	0.0121632	0.0852801
DOID:1852	intrahepatic cholestasis	DOID:14268	sclerosing cholangitis	0.0121613	0.0852254
DOID:1063	interstitial nephritis	DOID:10952	nephritis	0.0121575	0.0851799
DOID:4138	bile duct disease	DOID:2237	hepatitis	0.0121564	0.0851276
DOID:5223	infertility	DOID:1100	ovarian disease	0.0121549	0.085074
DOID:1091	tooth disease	DOID:8778	Crohn's disease	0.0121391	0.0851267
DOID:1240	leukemia	DOID:715	T-cell leukemia	0.0121367	0.0850769
DOID:10966	lipoid nephrosis	DOID:10952	nephritis	0.0121304	0.0850489
DOID:8805	intermediate coronary syndrome	DOID:5844	myocardial infarction	0.0121287	0.0849895
DOID:1936	atherosclerosis	DOID:2403	aneurysm disease	0.0121155	0.0850338
DOID:2234	focal epilepsy	DOID:11832	visual epilepsy	0.01211	0.0850008
DOID:114	heart disease	DOID:5614	eye disease	0.0120636	0.0852042
DOID:178	vascular disease	DOID:65	connective tissue disease	0.0120614	0.085153
DOID:331	central nervous system disease	DOID:526	Human immunodeficiency virus infectious disease	0.0120605	0.0850952
DOID:10952	nephritis	DOID:576	proteinuria	0.0120508	0.0850884
DOID:9351	diabetes mellitus	DOID:680	tauopathy	0.0120497	0.0850307
DOID:5223	infertility	DOID:48	male reproductive system disease	0.0120339	0.0850553
DOID:9351	diabetes mellitus	DOID:10652	Alzheimer's disease	0.012019	0.0850867
DOID:8924	autoimmune thrombocytopenic purpura	DOID:718	autoimmune hemolytic anemia	0.0120072	0.0850911
DOID:2723	dermatitis	DOID:9810	polyarteritis nodosa	0.0119841	0.0851044
DOID:2723	dermatitis	DOID:13378	Kawasaki disease	0.0119841	0.0851044
DOID:0050589	inflammatory bowel disease	DOID:76	stomach disease	0.0119773	0.0850797
DOID:1074	kidney failure	DOID:680	tauopathy	0.0119563	0.0851251
DOID:1555	urticaria	DOID:3310	atopic dermatitis	0.0119473	0.0851109
DOID:5614	eye disease	DOID:557	kidney disease	0.011946	0.0850565
DOID:1074	kidney failure	DOID:10652	Alzheimer's disease	0.0119336	0.0850691
DOID:409	liver disease	DOID:178	vascular disease	0.0119066	0.0851804
DOID:3342	bone inflammation disease	DOID:557	kidney disease	0.0119053	0.0851239
DOID:11202	primary hyperparathyroidism	DOID:13543	hyperparathyroidism	0.0118731	0.0852669
DOID:9538	multiple myeloma	DOID:2224	hemorrhagic thrombocythemia	0.0118673	0.0852348
DOID:2394	ovarian cancer	DOID:11054	urinary bladder cancer	0.0118639	0.0851932
DOID:170	endocrine gland cancer	DOID:3093	nervous system cancer	0.0118475	0.0852456
DOID:13544	low tension glaucoma	DOID:9282	ocular hypertension	0.0118444	0.0852069
DOID:8725	vascular dementia	DOID:13099	Moyamoya disease	0.0118308	0.0852334
DOID:9553	adrenal gland disease	DOID:2018	hyperinsulinism	0.0118196	0.0852303
DOID:120	female reproductive organ cancer	DOID:9119	acute myeloid leukemia	0.0118193	0.0851681
DOID:2174	ocular cancer	DOID:769	neuroblastoma	0.0118015	0.0852115
DOID:417	hypersensitivity reaction type II disease	DOID:680	tauopathy	0.0118001	0.0851532
DOID:8584	Burkitt's lymphoma	DOID:3721	plasmacytoma	0.0117956	0.0851148
DOID:417	hypersensitivity reaction type II disease	DOID:10652	Alzheimer's disease	0.0117759	0.0851757
DOID:6364	migraine	DOID:331	central nervous system disease	0.0117261	0.0854217
DOID:850	lung disease	DOID:10763	hypertension	0.0117136	0.0854222
DOID:12466	secondary hyperparathyroidism	DOID:50	thyroid gland disease	0.0117104	0.0853815
DOID:409	liver disease	DOID:1289	neurodegenerative disease	0.0117012	0.085379
DOID:409	liver disease	DOID:6050	esophageal disease	0.0116922	0.0853722
DOID:3083	chronic obstructive pulmonary disease	DOID:11162	respiratory failure	0.0116907	0.0853155
DOID:680	tauopathy	DOID:10763	hypertension	0.0116699	0.0853855
DOID:178	vascular disease	DOID:13089	intracranial arterial disease	0.0116638	0.0853582
DOID:417	hypersensitivity reaction type II disease	DOID:3342	bone inflammation disease	0.0116619	0.0853112
DOID:10652	Alzheimer's disease	DOID:10763	hypertension	0.0116535	0.0853022
DOID:848	arthritis	DOID:114	heart disease	0.0116492	0.0852691
DOID:229	female reproductive system disease	DOID:1289	neurodegenerative disease	0.0116395	0.0852573
DOID:10124	corneal disease	DOID:5679	retinal disease	0.0116333	0.0852302
DOID:3389	Papillon-Lefevre disease	DOID:161	keratosis	0.0116276	0.0851936
DOID:1247	blood coagulation disease	DOID:583	hemolytic anemia	0.0115677	0.0854807
DOID:5679	retinal disease	DOID:11832	visual epilepsy	0.0115197	0.0856969
DOID:2868	arterial occlusive disease	DOID:0080001	bone disease	0.011471	0.0859223
DOID:331	central nervous system disease	DOID:3407	carotid artery disease	0.0114694	0.0858716
DOID:3362	coronary aneurysm	DOID:10941	intracranial aneurysm	0.0114686	0.0858136
DOID:824	periodontitis	DOID:5082	liver cirrhosis	0.0114498	0.0858877
DOID:417	hypersensitivity reaction type II disease	DOID:2320	obstructive lung disease	0.0114305	0.0859442
DOID:3393	coronary heart disease	DOID:0080001	bone disease	0.0113892	0.0861512
DOID:824	periodontitis	DOID:0050589	inflammatory bowel disease	0.0113774	0.0861576
DOID:1091	tooth disease	DOID:8577	ulcerative colitis	0.0113724	0.0861337
DOID:178	vascular disease	DOID:7148	rheumatoid arthritis	0.0113696	0.0860953
DOID:1289	neurodegenerative disease	DOID:7148	rheumatoid arthritis	0.0113686	0.0860404
DOID:8398	osteoarthritis	DOID:65	connective tissue disease	0.0113519	0.086093
DOID:2921	glomerulonephritis	DOID:576	proteinuria	0.0113314	0.0861585
DOID:3394	ischemic heart disease	DOID:4247	coronary restenosis	0.011327	0.0861289
DOID:9074	systemic lupus erythematosus	DOID:11335	sarcoidosis	0.0113212	0.0861122
DOID:8645	subacute delirium	DOID:1742	drug psychosis	0.0113165	0.0860755
DOID:2403	aneurysm disease	DOID:6713	cerebrovascular disease	0.0113075	0.0860553
DOID:417	hypersensitivity reaction type II disease	DOID:1074	kidney failure	0.0112921	0.0860969
DOID:114	heart disease	DOID:37	skin disease	0.0112623	0.0862396
DOID:2349	arteriosclerosis	DOID:0080001	bone disease	0.0112513	0.0862473
DOID:850	lung disease	DOID:74	hematopoietic system disease	0.0112366	0.08626
DOID:3527	cerebral arterial disease	DOID:178	vascular disease	0.011226	0.0862699
DOID:3342	bone inflammation disease	DOID:936	brain disease	0.011218	0.0862639
DOID:2789	parasitic protozoa infectious disease	DOID:526	Human immunodeficiency virus infectious disease	0.0111986	0.0863231
DOID:1754	mitral valve stenosis	DOID:4079	heart valve disease	0.0111806	0.0863757
DOID:865	vasculitis	DOID:10591	pre-eclampsia	0.0111792	0.0863212
DOID:8466	retinal degeneration	DOID:13544	low tension glaucoma	0.011173	0.0863039
DOID:3093	nervous system cancer	DOID:9119	acute myeloid leukemia	0.0111663	0.0862794
DOID:3454	brain infarction	DOID:10763	hypertension	0.0111602	0.0862585
DOID:2825	nose disease	DOID:10459	common cold	0.011158	0.0862114
DOID:3394	ischemic heart disease	DOID:341	peripheral vascular disease	0.0111461	0.0862319
DOID:8466	retinal degeneration	DOID:680	tauopathy	0.0111452	0.0861784
DOID:11656	cicatricial pemphigoid	DOID:8506	bullous pemphigoid	0.0111373	0.0861626
DOID:8466	retinal degeneration	DOID:10652	Alzheimer's disease	0.0111368	0.086105
DOID:417	hypersensitivity reaction type II disease	DOID:4194	glucose metabolism disease	0.0111342	0.0860624
DOID:3310	atopic dermatitis	DOID:9182	pemphigus	0.0111246	0.0860723
DOID:2316	brain ischemia	DOID:341	peripheral vascular disease	0.0111122	0.0860871
DOID:120	female reproductive organ cancer	DOID:4001	ovarian carcinoma	0.0111018	0.0861054
DOID:417	hypersensitivity reaction type II disease	DOID:12894	Sjogren's syndrome	0.0110869	0.0861379
DOID:14069	cerebral malaria	DOID:12140	Chagas disease	0.0110863	0.0860813
DOID:332	amyotrophic lateral sclerosis	DOID:936	brain disease	0.0110773	0.086077
DOID:11054	urinary bladder cancer	DOID:170	endocrine gland cancer	0.0110762	0.086024
DOID:1074	kidney failure	DOID:10763	hypertension	0.0110534	0.0861072
DOID:8997	polycythemia vera	DOID:4961	bone marrow disease	0.0110476	0.0860796
DOID:2355	anemia	DOID:9074	systemic lupus erythematosus	0.0110445	0.0860415
DOID:3093	nervous system cancer	DOID:0060058	lymphoma	0.0110377	0.0860176
DOID:417	hypersensitivity reaction type II disease	DOID:9351	diabetes mellitus	0.0110072	0.0861491
DOID:2394	ovarian cancer	DOID:8692	myeloid leukemia	0.0109968	0.0861462
DOID:11476	osteoporosis	DOID:381	arthropathy	0.0109915	0.0861292
DOID:440	neuromuscular disease	DOID:11476	osteoporosis	0.0109677	0.0862133
DOID:4194	glucose metabolism disease	DOID:850	lung disease	0.0109385	0.0863359
DOID:417	hypersensitivity reaction type II disease	DOID:10763	hypertension	0.0109318	0.0863245
DOID:3620	central nervous system cancer	DOID:1659	supratentorial cancer	0.0109276	0.0862878
DOID:3627	aortic aneurysm	DOID:178	vascular disease	0.0109161	0.0862918
DOID:2320	obstructive lung disease	DOID:680	tauopathy	0.0109108	0.086265
DOID:2394	ovarian cancer	DOID:0060058	lymphoma	0.0109093	0.0862166
DOID:11984	hypertrophic cardiomyopathy	DOID:114	heart disease	0.0109022	0.0862053
DOID:1074	kidney failure	DOID:2527	nephrosis	0.0109008	0.0861514
DOID:2320	obstructive lung disease	DOID:10652	Alzheimer's disease	0.0108959	0.0861234
DOID:5295	intestinal disease	DOID:6050	esophageal disease	0.0108707	0.0862195
DOID:114	heart disease	DOID:3407	carotid artery disease	0.0108653	0.0861943
DOID:9074	systemic lupus erythematosus	DOID:12236	primary biliary cirrhosis	0.0108644	0.0861427
DOID:1307	dementia	DOID:2030	anxiety disorder	0.010862	0.086096
DOID:2349	arteriosclerosis	DOID:8725	vascular dementia	0.0108558	0.0860723
DOID:10113	trypanosomiasis	DOID:9111	cutaneous leishmaniasis	0.0108408	0.0861139
DOID:9351	diabetes mellitus	DOID:850	lung disease	0.0108154	0.0862172
DOID:3393	coronary heart disease	DOID:936	brain disease	0.0108119	0.0861775
DOID:418	systemic scleroderma	DOID:3342	bone inflammation disease	0.0108072	0.0861414
DOID:1936	atherosclerosis	DOID:0080001	bone disease	0.0107977	0.0861399
DOID:557	kidney disease	DOID:37	skin disease	0.0107673	0.0862567
DOID:848	arthritis	DOID:557	kidney disease	0.0107628	0.0862234
DOID:263	kidney cancer	DOID:2531	hematologic cancer	0.0107593	0.0861852
DOID:6000	congestive heart failure	DOID:10763	hypertension	0.010747	0.0862093
DOID:3393	coronary heart disease	DOID:557	kidney disease	0.0107146	0.0863547
DOID:440	neuromuscular disease	DOID:1289	neurodegenerative disease	0.0107122	0.0863069
DOID:2825	nose disease	DOID:3082	interstitial lung disease	0.0107013	0.0863239
DOID:2403	aneurysm disease	DOID:3363	coronary arteriosclerosis	0.0106985	0.0862831
DOID:11910	dystonia musculorum deformans	DOID:11119	Gilles de la Tourette syndrome	0.0106687	0.0864322
DOID:2868	arterial occlusive disease	DOID:557	kidney disease	0.0106611	0.0864182
DOID:2868	arterial occlusive disease	DOID:8725	vascular dementia	0.0106418	0.0864873
DOID:2237	hepatitis	DOID:8778	Crohn's disease	0.0106366	0.0864629
DOID:12930	dilated cardiomyopathy	DOID:5844	myocardial infarction	0.0106241	0.0864798
DOID:11054	urinary bladder cancer	DOID:3093	nervous system cancer	0.0106197	0.0864568
DOID:1247	blood coagulation disease	DOID:1205	hypersensitivity reaction type I disease	0.0105915	0.0865579
DOID:10652	Alzheimer's disease	DOID:2030	anxiety disorder	0.0105895	0.086511
DOID:417	hypersensitivity reaction type II disease	DOID:848	arthritis	0.0105823	0.0865079
DOID:9500	leukocyte disease	DOID:417	hypersensitivity reaction type II disease	0.0105815	0.0864603
DOID:0050589	inflammatory bowel disease	DOID:2044	drug-induced hepatitis	0.0105773	0.0864238
DOID:331	central nervous system disease	DOID:3083	chronic obstructive pulmonary disease	0.0105704	0.0864228
DOID:9540	vascular skin disease	DOID:3310	atopic dermatitis	0.0105587	0.0864389
DOID:6713	cerebrovascular disease	DOID:5679	retinal disease	0.0105562	0.086399
DOID:3363	coronary arteriosclerosis	DOID:1289	neurodegenerative disease	0.0105147	0.0866374
DOID:3620	central nervous system cancer	DOID:120	female reproductive organ cancer	0.0104718	0.0868542
DOID:2868	arterial occlusive disease	DOID:936	brain disease	0.010468	0.086823
DOID:1074	kidney failure	DOID:2320	obstructive lung disease	0.0104564	0.0868551
DOID:5093	thoracic cancer	DOID:4960	bone marrow cancer	0.0104454	0.0868763
DOID:11476	osteoporosis	DOID:854	collagen disease	0.0104337	0.0868933
DOID:2349	arteriosclerosis	DOID:557	kidney disease	0.0104256	0.0868853
DOID:680	tauopathy	DOID:74	hematopoietic system disease	0.0104223	0.086848
DOID:1612	breast cancer	DOID:4960	bone marrow cancer	0.0104182	0.0868163
DOID:3388	periodontal disease	DOID:8778	Crohn's disease	0.0104117	0.0868164
DOID:1184	nephrotic syndrome	DOID:557	kidney disease	0.0104102	0.086763
DOID:10652	Alzheimer's disease	DOID:74	hematopoietic system disease	0.0104067	0.0867294
DOID:178	vascular disease	DOID:1176	bronchial disease	0.0103872	0.0868066
DOID:8577	ulcerative colitis	DOID:2237	hepatitis	0.010378	0.0868061
DOID:9970	obesity	DOID:2018	hyperinsulinism	0.0103664	0.0868339
DOID:850	lung disease	DOID:3342	bone inflammation disease	0.0103639	0.0867901
DOID:4194	glucose metabolism disease	DOID:10763	hypertension	0.0103634	0.0867357
DOID:1247	blood coagulation disease	DOID:12987	agranulocytosis	0.0103462	0.086785
DOID:1909	melanoma	DOID:1240	leukemia	0.0103369	0.0867825
DOID:13269	hereditary coproporphyria	DOID:13268	porphyria	0.0103072	0.08693
DOID:2044	drug-induced hepatitis	DOID:12236	primary biliary cirrhosis	0.0102872	0.0869966
DOID:418	systemic scleroderma	DOID:1205	hypersensitivity reaction type I disease	0.0102747	0.0870148
DOID:319	spinal cord disease	DOID:331	central nervous system disease	0.0102741	0.0869604
DOID:418	systemic scleroderma	DOID:848	arthritis	0.0102729	0.0869101
DOID:11054	urinary bladder cancer	DOID:0060058	lymphoma	0.0102621	0.0869276
DOID:8692	myeloid leukemia	DOID:170	endocrine gland cancer	0.0102595	0.0868894
DOID:5295	intestinal disease	DOID:178	vascular disease	0.0102593	0.0868332
DOID:9351	diabetes mellitus	DOID:10763	hypertension	0.0102401	0.0869009
DOID:13258	typhoid fever	DOID:2957	pulmonary tuberculosis	0.0102305	0.0869057
DOID:1289	neurodegenerative disease	DOID:1176	bronchial disease	0.0102186	0.0869298
DOID:409	liver disease	DOID:9446	cholangitis	0.0102148	0.0869011
DOID:1074	kidney failure	DOID:74	hematopoietic system disease	0.0102134	0.0868531
DOID:1074	kidney failure	DOID:4194	glucose metabolism disease	0.0101979	0.0869099
DOID:9553	adrenal gland disease	DOID:50	thyroid gland disease	0.0101886	0.0869173
DOID:1826	epilepsy syndrome	DOID:5614	eye disease	0.0101883	0.0868634
DOID:1247	blood coagulation disease	DOID:10608	celiac disease	0.010185	0.0868316
DOID:2841	asthma	DOID:178	vascular disease	0.0101796	0.0868184
DOID:8725	vascular dementia	DOID:3455	cerebrovascular accident	0.0101779	0.0867673
DOID:4195	hyperglycemia	DOID:4194	glucose metabolism disease	0.0101656	0.086806
DOID:936	brain disease	DOID:37	skin disease	0.0101641	0.0867596
DOID:848	arthritis	DOID:936	brain disease	0.0101601	0.086724
DOID:2349	arteriosclerosis	DOID:936	brain disease	0.010153	0.0867129
DOID:11476	osteoporosis	DOID:1289	neurodegenerative disease	0.0101453	0.0867058
DOID:13001	carotid stenosis	DOID:936	brain disease	0.0101402	0.0866821
DOID:8616	Peyronie's disease	DOID:1875	impotence	0.0101333	0.0866757
DOID:1240	leukemia	DOID:3908	non-small cell lung carcinoma	0.0101208	0.0866978
DOID:1926	Gaucher's disease	DOID:9452	fatty liver disease	0.0101208	0.0866411
DOID:850	lung disease	DOID:37	skin disease	0.0101045	0.0866922
DOID:3394	ischemic heart disease	DOID:1289	neurodegenerative disease	0.0101038	0.0866389
DOID:399	tuberculosis	DOID:526	Human immunodeficiency virus infectious disease	0.0100936	0.0866557
DOID:5093	thoracic cancer	DOID:1289	neurodegenerative disease	0.0100917	0.0866111
DOID:1074	kidney failure	DOID:9351	diabetes mellitus	0.010076	0.0866739
DOID:3119	gastrointestinal system cancer	DOID:0080001	bone disease	0.0100564	0.0867558
DOID:1289	neurodegenerative disease	DOID:1612	breast cancer	0.010046	0.0867704
DOID:13241	Behcet's disease	DOID:3875	thrombophlebitis	0.0100453	0.0866629
DOID:864	phlebitis	DOID:13241	Behcet's disease	0.0100453	0.0866629
DOID:2841	asthma	DOID:1289	neurodegenerative disease	0.0100381	0.08665
DOID:418	systemic scleroderma	DOID:74	hematopoietic system disease	0.0100318	0.0866391
DOID:5295	intestinal disease	DOID:1289	neurodegenerative disease	0.0100041	0.0867718
DOID:1307	dementia	DOID:680	tauopathy	0.00999734	0.0867752
DOID:1936	atherosclerosis	DOID:557	kidney disease	0.00999316	0.0867446
DOID:417	hypersensitivity reaction type II disease	DOID:75	lymphatic system disease	0.00999109	0.0867035
DOID:11713	diabetic angiopathy	DOID:178	vascular disease	0.00998783	0.0866704
DOID:8538	reticulosarcoma	DOID:120	female reproductive organ cancer	0.00998331	0.0866431
DOID:2320	obstructive lung disease	DOID:10763	hypertension	0.00997871	0.0866218
DOID:883	parasitic helminthiasis infectious disease	DOID:9146	visceral leishmaniasis	0.00996222	0.086688
DOID:10459	common cold	DOID:4483	rhinitis	0.00996044	0.0866445
DOID:8466	retinal degeneration	DOID:13641	exfoliation syndrome	0.00993678	0.0867568
DOID:13564	aspergillosis	DOID:12662	paracoccidioidomycosis	0.00992357	0.0867857
DOID:2868	arterial occlusive disease	DOID:3454	brain infarction	0.00992098	0.0867461
DOID:2355	anemia	DOID:615	leukopenia	0.00991796	0.0867176
DOID:170	endocrine gland cancer	DOID:0060058	lymphoma	0.00990283	0.0867633
DOID:8432	polycythemia	DOID:12449	aplastic anemia	0.00989417	0.0867778
DOID:3388	periodontal disease	DOID:8577	ulcerative colitis	0.00987159	0.0868747
DOID:403	mouth disease	DOID:76	stomach disease	0.00986285	0.0868903
DOID:9351	diabetes mellitus	DOID:4195	hyperglycemia	0.00986061	0.0868463
DOID:850	lung disease	DOID:5614	eye disease	0.00983564	0.0869605
DOID:409	liver disease	DOID:0080001	bone disease	0.00983459	0.0869106
DOID:2723	dermatitis	DOID:4535	hypotrichosis	0.00983226	0.0868731
DOID:4194	glucose metabolism disease	DOID:1240	leukemia	0.0098259	0.0868674
DOID:229	female reproductive system disease	DOID:0080001	bone disease	0.00980076	0.0869981
DOID:13001	carotid stenosis	DOID:13089	intracranial arterial disease	0.00979853	0.086958
DOID:1063	interstitial nephritis	DOID:2921	glomerulonephritis	0.00978244	0.08702
DOID:403	mouth disease	DOID:9637	stomatitis	0.00977658	0.0870039
DOID:2349	arteriosclerosis	DOID:3454	brain infarction	0.00977344	0.0869671
DOID:680	tauopathy	DOID:3342	bone inflammation disease	0.00975305	0.0870586
DOID:2320	obstructive lung disease	DOID:74	hematopoietic system disease	0.00975055	0.0870174
DOID:12716	newborn respiratory distress syndrome	DOID:11396	pulmonary edema	0.00974197	0.0870347
DOID:10652	Alzheimer's disease	DOID:3342	bone inflammation disease	0.00973955	0.0869949
DOID:5773	oral submucous fibrosis	DOID:1091	tooth disease	0.00973791	0.0869447
DOID:417	hypersensitivity reaction type II disease	DOID:37	skin disease	0.00973619	0.0869004
DOID:9351	diabetes mellitus	DOID:1240	leukemia	0.00972516	0.0869249
DOID:13641	exfoliation syndrome	DOID:12030	panuveitis	0.00970164	0.0870282
DOID:4193	intracranial thrombosis	DOID:6713	cerebrovascular disease	0.00969367	0.0870276
DOID:14503	neuronal ceroid-lipofuscinosis	DOID:9455	lipid storage disease	0.00968364	0.0870352
DOID:106	pleural tuberculosis	DOID:399	tuberculosis	0.00966517	0.0871261
DOID:14069	cerebral malaria	DOID:9111	cutaneous leishmaniasis	0.00966195	0.087096
DOID:74	hematopoietic system disease	DOID:10763	hypertension	0.00964525	0.0871573
DOID:5082	liver cirrhosis	DOID:5353	colonic disease	0.00963565	0.0871642
DOID:409	liver disease	DOID:4029	gastritis	0.00962891	0.087145
DOID:1936	atherosclerosis	DOID:936	brain disease	0.00961805	0.0871634
DOID:1508	candidiasis	DOID:11339	pneumocystosis	0.00961718	0.0871154
DOID:7998	hyperthyroidism	DOID:4989	pancreatitis	0.00960985	0.0871064
DOID:2403	aneurysm disease	DOID:114	heart disease	0.00960869	0.0870624
DOID:1936	atherosclerosis	DOID:8725	vascular dementia	0.00960714	0.0870153
DOID:1875	impotence	DOID:48	male reproductive system disease	0.00959712	0.0870375
DOID:331	central nervous system disease	DOID:9074	systemic lupus erythematosus	0.00957837	0.087124
DOID:1749	squamous cell carcinoma	DOID:3113	papillary carcinoma	0.00956381	0.0871785
DOID:2355	anemia	DOID:2218	blood platelet disease	0.00956235	0.0871327
DOID:8692	myeloid leukemia	DOID:11054	urinary bladder cancer	0.00955128	0.0871504
DOID:9452	fatty liver disease	DOID:2747	glycogen storage disease	0.00954876	0.0871129
DOID:3119	gastrointestinal system cancer	DOID:557	kidney disease	0.00953091	0.0871863
DOID:3119	gastrointestinal system cancer	DOID:114	heart disease	0.00950201	0.0873521
DOID:3527	cerebral arterial disease	DOID:13001	carotid stenosis	0.00950121	0.0873025
DOID:440	neuromuscular disease	DOID:9074	systemic lupus erythematosus	0.00949568	0.0872764
DOID:11247	disseminated intravascular coagulation	DOID:2218	blood platelet disease	0.00949376	0.0872351
DOID:14115	toxic shock syndrome	DOID:2957	pulmonary tuberculosis	0.00949294	0.0871876
DOID:850	lung disease	DOID:848	arthritis	0.00947991	0.0872399
DOID:1936	atherosclerosis	DOID:3454	brain infarction	0.00945346	0.0874006
DOID:120	female reproductive organ cancer	DOID:3908	non-small cell lung carcinoma	0.00945003	0.0873714
DOID:6364	migraine	DOID:679	basal ganglia disease	0.00944648	0.087344
DOID:12140	Chagas disease	DOID:9111	cutaneous leishmaniasis	0.00943203	0.0874194
DOID:114	heart disease	DOID:4247	coronary restenosis	0.00940028	0.0876117
DOID:3342	bone inflammation disease	DOID:10763	hypertension	0.0093918	0.0876157
DOID:13241	Behcet's disease	DOID:10763	hypertension	0.00938937	0.0875776
DOID:0050589	inflammatory bowel disease	DOID:331	central nervous system disease	0.00938884	0.0875245
DOID:445	Bartter disease	DOID:9553	adrenal gland disease	0.00938745	0.0874821
DOID:2403	aneurysm disease	DOID:3455	cerebrovascular accident	0.00937947	0.0874868
DOID:2394	ovarian cancer	DOID:1749	squamous cell carcinoma	0.00937329	0.0874853
DOID:10608	celiac disease	DOID:13241	Behcet's disease	0.00935584	0.0875683
DOID:8692	myeloid leukemia	DOID:3620	central nervous system cancer	0.00935354	0.0875322
DOID:1240	leukemia	DOID:331	central nervous system disease	0.00933252	0.0876345
DOID:10591	pre-eclampsia	DOID:6432	pulmonary hypertension	0.00932586	0.087631
DOID:409	liver disease	DOID:114	heart disease	0.00932538	0.0875806
DOID:12731	pars planitis	DOID:13141	uveitis	0.00930112	0.0877114
DOID:161	keratosis	DOID:37	skin disease	0.0092903	0.0877341
DOID:679	basal ganglia disease	DOID:3213	demyelinating disease	0.00928693	0.0877037
DOID:1289	neurodegenerative disease	DOID:2531	hematologic cancer	0.00927889	0.0877138
DOID:3119	gastrointestinal system cancer	DOID:936	brain disease	0.00926159	0.0877975
DOID:9455	lipid storage disease	DOID:14499	Fabry disease	0.00925145	0.0878337
DOID:3393	coronary heart disease	DOID:865	vasculitis	0.00923759	0.0878768
DOID:5093	thoracic cancer	DOID:178	vascular disease	0.00919293	0.0881847
DOID:409	liver disease	DOID:557	kidney disease	0.00919134	0.0881423
DOID:5773	oral submucous fibrosis	DOID:3388	periodontal disease	0.00917217	0.0882366
DOID:11476	osteoporosis	DOID:178	vascular disease	0.00917216	0.0881819
DOID:65	connective tissue disease	DOID:557	kidney disease	0.00916659	0.088165
DOID:178	vascular disease	DOID:1612	breast cancer	0.00916037	0.0881649
DOID:114	heart disease	DOID:65	connective tissue disease	0.00915918	0.0881196
DOID:10128	venous insufficiency	DOID:799	varicose veins	0.00914131	0.0882099
DOID:229	female reproductive system disease	DOID:936	brain disease	0.00912283	0.0882908
DOID:6364	migraine	DOID:1826	epilepsy syndrome	0.00910944	0.0883506
DOID:865	vasculitis	DOID:326	ischemia	0.00910897	0.0882985
DOID:0080001	bone disease	DOID:5295	intestinal disease	0.00909771	0.0883329
DOID:417	hypersensitivity reaction type II disease	DOID:5614	eye disease	0.00909619	0.0882944
DOID:229	female reproductive system disease	DOID:114	heart disease	0.00909612	0.08824
DOID:5419	schizophrenia	DOID:2030	anxiety disorder	0.00908735	0.0882682
DOID:2320	obstructive lung disease	DOID:4194	glucose metabolism disease	0.00908717	0.0882138
DOID:0050589	inflammatory bowel disease	DOID:6050	esophageal disease	0.00908452	0.0881736
DOID:1749	squamous cell carcinoma	DOID:170	endocrine gland cancer	0.00907584	0.0881828
DOID:3132	porphyria cutanea tarda	DOID:13269	hereditary coproporphyria	0.00907029	0.0881697
DOID:2377	multiple sclerosis	DOID:679	basal ganglia disease	0.00906175	0.0881856
DOID:1909	melanoma	DOID:120	female reproductive organ cancer	0.00906117	0.0881351
DOID:229	female reproductive system disease	DOID:557	kidney disease	0.0090576	0.0881074
DOID:418	systemic scleroderma	DOID:7148	rheumatoid arthritis	0.00904574	0.0881368
DOID:679	basal ganglia disease	DOID:5614	eye disease	0.00904202	0.0881171
DOID:5844	myocardial infarction	DOID:4247	coronary restenosis	0.00902391	0.0882028
DOID:2018	hyperinsulinism	DOID:4988	alcoholic pancreatitis	0.00901179	0.088237
DOID:9500	leukocyte disease	DOID:2213	hemorrhagic disease	0.00900837	0.088216
DOID:3119	gastrointestinal system cancer	DOID:363	uterine cancer	0.00899314	0.088285
DOID:2320	obstructive lung disease	DOID:9351	diabetes mellitus	0.00898553	0.0882952
DOID:9470	bacterial meningitis	DOID:10310	viral meningitis	0.00897887	0.0882859
DOID:11394	adult respiratory distress syndrome	DOID:11396	pulmonary edema	0.00897549	0.0882613
DOID:2986	IgA glomerulonephritis	DOID:10976	membranous glomerulonephritis	0.00896009	0.0883307
DOID:114	heart disease	DOID:7148	rheumatoid arthritis	0.00895004	0.0883622
DOID:2320	obstructive lung disease	DOID:3342	bone inflammation disease	0.00893307	0.0884357
DOID:263	kidney cancer	DOID:1240	leukemia	0.00892663	0.088444
DOID:0080001	bone disease	DOID:3363	coronary arteriosclerosis	0.00890422	0.0885429
DOID:1826	epilepsy syndrome	DOID:3213	demyelinating disease	0.00890377	0.0884927
DOID:676	juvenile rheumatoid arthritis	DOID:8398	osteoarthritis	0.00890275	0.0884462
DOID:3021	acute kidney failure	DOID:557	kidney disease	0.00890259	0.0883955
DOID:2531	hematologic cancer	DOID:715	T-cell leukemia	0.00890127	0.0883509
DOID:5679	retinal disease	DOID:10003	sensorineural hearing loss	0.00888832	0.0883975
DOID:2868	arterial occlusive disease	DOID:850	lung disease	0.00888811	0.0883445
DOID:1754	mitral valve stenosis	DOID:11502	mitral valve insufficiency	0.00888145	0.0883412
DOID:848	arthritis	DOID:680	tauopathy	0.00888038	0.0882992
DOID:409	liver disease	DOID:750	peptic ulcer	0.0088766	0.0882742
DOID:1074	kidney failure	DOID:3342	bone inflammation disease	0.00887486	0.0882323
DOID:10652	Alzheimer's disease	DOID:848	arthritis	0.00886827	0.0882322
DOID:6364	migraine	DOID:14330	Parkinson's disease	0.00885148	0.0883257
DOID:10575	calcium metabolism disease	DOID:12678	hypercalcemia	0.00884744	0.0883043
DOID:2868	arterial occlusive disease	DOID:6000	congestive heart failure	0.00884327	0.0882867
DOID:403	mouth disease	DOID:2044	drug-induced hepatitis	0.00884071	0.0882581
DOID:12731	pars planitis	DOID:12030	panuveitis	0.00882605	0.0883267
DOID:1247	blood coagulation disease	DOID:1227	neutropenia	0.00881278	0.0883837
DOID:5082	liver cirrhosis	DOID:331	central nervous system disease	0.00881017	0.0883486
DOID:11247	disseminated intravascular coagulation	DOID:1588	thrombocytopenia	0.00880507	0.0883327
DOID:9741	biliary tract disease	DOID:2044	drug-induced hepatitis	0.00880392	0.0882904
DOID:2320	obstructive lung disease	DOID:37	skin disease	0.00879111	0.0883425
DOID:3407	carotid artery disease	DOID:10591	pre-eclampsia	0.00878981	0.0882985
DOID:3393	coronary heart disease	DOID:850	lung disease	0.00878716	0.0882599
DOID:326	ischemia	DOID:3407	carotid artery disease	0.00878144	0.0882543
DOID:8584	Burkitt's lymphoma	DOID:285	hairy cell leukemia	0.00877902	0.0882302
DOID:332	amyotrophic lateral sclerosis	DOID:3213	demyelinating disease	0.00877893	0.0881786
DOID:1285	rectal disease	DOID:5353	colonic disease	0.00877363	0.0881671
DOID:409	liver disease	DOID:936	brain disease	0.00877248	0.0881251
DOID:2868	arterial occlusive disease	DOID:680	tauopathy	0.00877014	0.0880903
DOID:4138	bile duct disease	DOID:2044	drug-induced hepatitis	0.00876331	0.0880938
DOID:3393	coronary heart disease	DOID:4079	heart valve disease	0.00875814	0.0880878
DOID:3393	coronary heart disease	DOID:680	tauopathy	0.00875681	0.0880454
DOID:5614	eye disease	DOID:10763	hypertension	0.0087485	0.0880573
DOID:2868	arterial occlusive disease	DOID:10652	Alzheimer's disease	0.00874567	0.0880239
DOID:3363	coronary arteriosclerosis	DOID:8725	vascular dementia	0.00873744	0.0880334
DOID:3393	coronary heart disease	DOID:10652	Alzheimer's disease	0.008732	0.0880244
DOID:1289	neurodegenerative disease	DOID:526	Human immunodeficiency virus infectious disease	0.00872726	0.0880065
DOID:1024	leprosy	DOID:11077	brucellosis	0.00872638	0.0879607
DOID:9741	biliary tract disease	DOID:5295	intestinal disease	0.00871763	0.0879822
DOID:2349	arteriosclerosis	DOID:850	lung disease	0.00871036	0.0879994
DOID:0050597	intestinal schistosomiasis	DOID:9065	leishmaniasis	0.00869313	0.0880855
DOID:2377	multiple sclerosis	DOID:1826	epilepsy syndrome	0.00868533	0.0880985
DOID:9538	multiple myeloma	DOID:3119	gastrointestinal system cancer	0.00868256	0.0880759
DOID:9741	biliary tract disease	DOID:12236	primary biliary cirrhosis	0.0086739	0.0880871
DOID:2349	arteriosclerosis	DOID:6000	congestive heart failure	0.00866219	0.0881297
DOID:5409	lung small cell carcinoma	DOID:9261	nasopharynx carcinoma	0.00866152	0.0880805
DOID:0080001	bone disease	DOID:1176	bronchial disease	0.0086614	0.088029
DOID:5082	liver cirrhosis	DOID:6050	esophageal disease	0.00865981	0.0879882
DOID:4138	bile duct disease	DOID:5295	intestinal disease	0.00865676	0.0879734
DOID:1074	kidney failure	DOID:5614	eye disease	0.00865217	0.0879646
DOID:4138	bile duct disease	DOID:12236	primary biliary cirrhosis	0.00863983	0.0880201
DOID:2377	multiple sclerosis	DOID:332	amyotrophic lateral sclerosis	0.00862684	0.0880732
DOID:2986	IgA glomerulonephritis	DOID:10966	lipoid nephrosis	0.00862067	0.0880743
DOID:13636	Fanconi's anemia	DOID:583	hemolytic anemia	0.00861904	0.0880312
DOID:8466	retinal degeneration	DOID:9282	ocular hypertension	0.00861435	0.08802
DOID:1921	Klinefelter's syndrome	DOID:14250	Down syndrome	0.00860111	0.0880736
DOID:2349	arteriosclerosis	DOID:680	tauopathy	0.00859956	0.0880353
DOID:1749	squamous cell carcinoma	DOID:11054	urinary bladder cancer	0.00858856	0.0880782
DOID:4483	rhinitis	DOID:3082	interstitial lung disease	0.00858583	0.0880505
DOID:178	vascular disease	DOID:2531	hematologic cancer	0.00857619	0.0880781
DOID:2349	arteriosclerosis	DOID:10652	Alzheimer's disease	0.00857551	0.0880358
DOID:2213	hemorrhagic disease	DOID:4961	bone marrow disease	0.00857211	0.0880082
DOID:848	arthritis	DOID:10763	hypertension	0.00857109	0.0879672
DOID:4194	glucose metabolism disease	DOID:74	hematopoietic system disease	0.00856938	0.0879326
DOID:440	neuromuscular disease	DOID:936	brain disease	0.0085315	0.0882043
DOID:3394	ischemic heart disease	DOID:936	brain disease	0.00852434	0.0881995
DOID:2113	coccidiosis	DOID:2789	parasitic protozoa infectious disease	0.00851519	0.0882181
DOID:2841	asthma	DOID:0080001	bone disease	0.00850854	0.0882151
DOID:4194	glucose metabolism disease	DOID:3342	bone inflammation disease	0.00849788	0.0882687
DOID:3324	mood disorder	DOID:2030	anxiety disorder	0.00849262	0.088258
DOID:417	hypersensitivity reaction type II disease	DOID:7148	rheumatoid arthritis	0.00847895	0.088318
DOID:9351	diabetes mellitus	DOID:74	hematopoietic system disease	0.00846282	0.0884023
DOID:161	keratosis	DOID:6498	seborrheic keratosis	0.00846154	0.0883648
DOID:4193	intracranial thrombosis	DOID:3455	cerebrovascular accident	0.00845727	0.0883529
DOID:178	vascular disease	DOID:6432	pulmonary hypertension	0.00844169	0.0884319
DOID:1749	squamous cell carcinoma	DOID:3093	nervous system cancer	0.00844129	0.0883851
DOID:1289	neurodegenerative disease	DOID:3407	carotid artery disease	0.00843608	0.0883756
DOID:263	kidney cancer	DOID:120	female reproductive organ cancer	0.00843592	0.0883242
DOID:9351	diabetes mellitus	DOID:3342	bone inflammation disease	0.00841131	0.0884646
DOID:6713	cerebrovascular disease	DOID:557	kidney disease	0.0084069	0.0884504
DOID:2320	obstructive lung disease	DOID:5614	eye disease	0.00840284	0.0884414
DOID:8466	retinal degeneration	DOID:10124	corneal disease	0.0084017	0.0883988
DOID:680	tauopathy	DOID:37	skin disease	0.00840013	0.0883598
DOID:10652	Alzheimer's disease	DOID:37	skin disease	0.00838971	0.0883851
DOID:2030	anxiety disorder	DOID:593	agoraphobia	0.00838762	0.0883472
DOID:1936	atherosclerosis	DOID:850	lung disease	0.00838697	0.0882996
DOID:1936	atherosclerosis	DOID:6000	congestive heart failure	0.00837598	0.0883445
DOID:3342	bone inflammation disease	DOID:74	hematopoietic system disease	0.00837466	0.0883039
DOID:5295	intestinal disease	DOID:4029	gastritis	0.00837338	0.0882627
DOID:14330	Parkinson's disease	DOID:5614	eye disease	0.00837163	0.0882279
DOID:178	vascular disease	DOID:13001	carotid stenosis	0.00835465	0.0883218
DOID:417	hypersensitivity reaction type II disease	DOID:7188	autoimmune thyroiditis	0.00834804	0.088328
DOID:7682	ruptured aortic aneurysm	DOID:10941	intracranial aneurysm	0.00833914	0.0883491
DOID:1529	penile disease	DOID:4762	vasculogenic impotence	0.00833333	0.0883391
DOID:2394	ovarian cancer	DOID:9119	acute myeloid leukemia	0.00832165	0.0883999
DOID:114	heart disease	DOID:1176	bronchial disease	0.00830717	0.0884664
DOID:5295	intestinal disease	DOID:114	heart disease	0.00830527	0.0884276
DOID:3363	coronary arteriosclerosis	DOID:557	kidney disease	0.00830503	0.0883785
DOID:5679	retinal disease	DOID:3455	cerebrovascular accident	0.00830385	0.0883393
DOID:7148	rheumatoid arthritis	DOID:557	kidney disease	0.00829845	0.0883437
DOID:5082	liver cirrhosis	DOID:9446	cholangitis	0.00829551	0.0883228
DOID:1247	blood coagulation disease	DOID:12449	aplastic anemia	0.00829209	0.0882946
DOID:1074	kidney failure	DOID:3393	coronary heart disease	0.00828743	0.0882847
DOID:5679	retinal disease	DOID:3213	demyelinating disease	0.00828307	0.0882713
DOID:8577	ulcerative colitis	DOID:76	stomach disease	0.00827411	0.0882969
DOID:3363	coronary arteriosclerosis	DOID:3454	brain infarction	0.00827308	0.088251
DOID:936	brain disease	DOID:65	connective tissue disease	0.00826666	0.0882537
DOID:1289	neurodegenerative disease	DOID:3083	chronic obstructive pulmonary disease	0.00825085	0.0883295
DOID:3394	ischemic heart disease	DOID:0080001	bone disease	0.00824932	0.0882882
DOID:2868	arterial occlusive disease	DOID:1074	kidney failure	0.00824727	0.0882544
DOID:0080001	bone disease	DOID:6713	cerebrovascular disease	0.00824303	0.08824
DOID:6039	intraocular melanoma	DOID:3479	uveal cancer	0.00823876	0.0882222
DOID:1024	leprosy	DOID:13258	typhoid fever	0.00822588	0.0882779
DOID:2723	dermatitis	DOID:987	alopecia	0.00821748	0.088292
DOID:2320	obstructive lung disease	DOID:848	arthritis	0.00820914	0.0883157
DOID:1936	atherosclerosis	DOID:680	tauopathy	0.00820723	0.088282
DOID:1342	congenital hypoplastic anemia	DOID:74	hematopoietic system disease	0.00820667	0.0882369
DOID:2106	Thomsen disease	DOID:11722	myotonic dystrophy	0.00820646	0.088188
DOID:76	stomach disease	DOID:8778	Crohn's disease	0.00820494	0.0881515
DOID:5223	infertility	DOID:12336	male infertility	0.00820413	0.0881089
DOID:824	periodontitis	DOID:8778	Crohn's disease	0.00819813	0.08811
DOID:6364	migraine	DOID:1289	neurodegenerative disease	0.00819218	0.0881099
DOID:2355	anemia	DOID:1588	thrombocytopenia	0.00819141	0.0880668
DOID:9970	obesity	DOID:10575	calcium metabolism disease	0.00818664	0.0880543
DOID:341	peripheral vascular disease	DOID:5844	myocardial infarction	0.0081849	0.0880153
DOID:1936	atherosclerosis	DOID:10652	Alzheimer's disease	0.00818395	0.0879729
DOID:615	leukopenia	DOID:4961	bone marrow disease	0.00817586	0.0879949
DOID:5614	eye disease	DOID:74	hematopoietic system disease	0.00817348	0.0879588
DOID:13543	hyperparathyroidism	DOID:7998	hyperthyroidism	0.00817234	0.0879204
DOID:1459	hypothyroidism	DOID:11633	thyroid hormone resistance syndrome	0.0081718	0.0878765
DOID:2841	asthma	DOID:114	heart disease	0.00815338	0.0879752
DOID:3119	gastrointestinal system cancer	DOID:526	Human immunodeficiency virus infectious disease	0.00815305	0.0879279
DOID:12731	pars planitis	DOID:1407	anterior uveitis	0.00814867	0.0879206
DOID:13884	sick sinus syndrome	DOID:384	Wolff-Parkinson-White syndrome	0.00814545	0.0879015
DOID:229	female reproductive system disease	DOID:74	hematopoietic system disease	0.00813775	0.0879117
DOID:1529	penile disease	DOID:12336	male infertility	0.00812706	0.0879539
DOID:2868	arterial occlusive disease	DOID:13241	Behcet's disease	0.00812536	0.0879174
DOID:10128	venous insufficiency	DOID:864	phlebitis	0.0081078	0.087986
DOID:10128	venous insufficiency	DOID:3875	thrombophlebitis	0.0081078	0.087986
DOID:5093	thoracic cancer	DOID:363	uterine cancer	0.00809673	0.0880325
DOID:850	lung disease	DOID:65	connective tissue disease	0.00808928	0.0880488
DOID:2349	arteriosclerosis	DOID:1074	kidney failure	0.00807715	0.0881076
DOID:11335	sarcoidosis	DOID:1205	hypersensitivity reaction type I disease	0.00807129	0.0881041
DOID:2403	aneurysm disease	DOID:10591	pre-eclampsia	0.00806605	0.0881013
DOID:363	uterine cancer	DOID:1612	breast cancer	0.00805353	0.0881667
DOID:1074	kidney failure	DOID:848	arthritis	0.00805173	0.0881336
DOID:1074	kidney failure	DOID:37	skin disease	0.00804749	0.0881201
DOID:11914	gastroparesis	DOID:76	stomach disease	0.00804579	0.0880865
DOID:5773	oral submucous fibrosis	DOID:824	periodontitis	0.0080435	0.0880625
DOID:2377	multiple sclerosis	DOID:5679	retinal disease	0.00803038	0.0881389
DOID:5409	lung small cell carcinoma	DOID:3910	lung adenocarcinoma	0.00801941	0.0881812
DOID:14069	cerebral malaria	DOID:0050597	intestinal schistosomiasis	0.00801884	0.0881359
DOID:5295	intestinal disease	DOID:12236	primary biliary cirrhosis	0.00800974	0.0881693
DOID:3394	ischemic heart disease	DOID:557	kidney disease	0.00800822	0.0881341
DOID:10763	hypertension	DOID:37	skin disease	0.00800502	0.0881085
DOID:5295	intestinal disease	DOID:750	peptic ulcer	0.00799917	0.0881173
DOID:2349	arteriosclerosis	DOID:13241	Behcet's disease	0.00799657	0.0880939
DOID:341	peripheral vascular disease	DOID:12918	thromboangiitis obliterans	0.00799483	0.088065
DOID:10113	trypanosomiasis	DOID:9146	visceral leishmaniasis	0.00798096	0.0881287
DOID:4194	glucose metabolism disease	DOID:120	female reproductive organ cancer	0.0079789	0.0880976
DOID:417	hypersensitivity reaction type II disease	DOID:12132	Wegener's granulomatosis	0.00796367	0.0881879
DOID:2452	thrombophilia	DOID:583	hemolytic anemia	0.00796357	0.0881407
DOID:583	hemolytic anemia	DOID:4961	bone marrow disease	0.00796159	0.0881185
DOID:8398	osteoarthritis	DOID:7147	ankylosing spondylitis	0.00795878	0.0880902
DOID:13832	patent ductus arteriosus	DOID:1882	atrial heart septal defect	0.0079579	0.0880492
DOID:178	vascular disease	DOID:5679	retinal disease	0.00794924	0.0880735
DOID:4194	glucose metabolism disease	DOID:1168	familial hyperlipidemia	0.00794446	0.088063
DOID:417	hypersensitivity reaction type II disease	DOID:3393	coronary heart disease	0.00793257	0.0881182
DOID:1686	glaucoma	DOID:2742	auditory system disease	0.00793009	0.0880861
DOID:409	liver disease	DOID:850	lung disease	0.00793005	0.0880386
DOID:1307	dementia	DOID:3119	gastrointestinal system cancer	0.00792118	0.0880673
DOID:9351	diabetes mellitus	DOID:120	female reproductive organ cancer	0.0078983	0.0882066
DOID:9849	Meniere's disease	DOID:10003	sensorineural hearing loss	0.00789804	0.0881101
DOID:9848	endolymphatic hydrops	DOID:10003	sensorineural hearing loss	0.00789804	0.0881101
DOID:1074	kidney failure	DOID:1184	nephrotic syndrome	0.00789623	0.0880748
DOID:3393	coronary heart disease	DOID:3407	carotid artery disease	0.0078908	0.0880786
DOID:8398	osteoarthritis	DOID:9074	systemic lupus erythematosus	0.00788943	0.088044
DOID:1936	atherosclerosis	DOID:13241	Behcet's disease	0.00788536	0.0880357
DOID:3363	coronary arteriosclerosis	DOID:936	brain disease	0.00788347	0.088
DOID:7693	abdominal aortic aneurysm	DOID:178	vascular disease	0.00788278	0.0879556
DOID:170	endocrine gland cancer	DOID:9119	acute myeloid leukemia	0.00786861	0.0880132
DOID:4194	glucose metabolism disease	DOID:5614	eye disease	0.00786624	0.087983
DOID:2316	brain ischemia	DOID:865	vasculitis	0.00786605	0.0879354
DOID:13241	Behcet's disease	DOID:3049	Churg-Strauss syndrome	0.00784915	0.0880153
DOID:9351	diabetes mellitus	DOID:1168	familial hyperlipidemia	0.00784914	0.0879672
DOID:229	female reproductive system disease	DOID:850	lung disease	0.00784323	0.0879754
DOID:403	mouth disease	DOID:6050	esophageal disease	0.00783991	0.0879694
DOID:1883	hepatitis C	DOID:2043	hepatitis B	0.00783837	0.0879317
DOID:2316	brain ischemia	DOID:3407	carotid artery disease	0.0078301	0.0879536
DOID:8466	retinal degeneration	DOID:11832	visual epilepsy	0.0078232	0.0879651
DOID:11758	iron deficiency anemia	DOID:12449	aplastic anemia	0.00781668	0.0879635
DOID:417	hypersensitivity reaction type II disease	DOID:2213	hemorrhagic disease	0.00780927	0.0879804
DOID:824	periodontitis	DOID:8577	ulcerative colitis	0.0078085	0.0879401
DOID:12306	vitiligo	DOID:9074	systemic lupus erythematosus	0.00780795	0.087896
DOID:417	hypersensitivity reaction type II disease	DOID:409	liver disease	0.0078045	0.0878787
DOID:75	lymphatic system disease	DOID:74	hematopoietic system disease	0.00780426	0.0878314
DOID:1837	diabetic ketoacidosis	DOID:14221	metabolic syndrome X	0.00780301	0.0877951
DOID:417	hypersensitivity reaction type II disease	DOID:2868	arterial occlusive disease	0.00780139	0.087761
DOID:403	mouth disease	DOID:5353	colonic disease	0.00779253	0.0877877
DOID:1936	atherosclerosis	DOID:1074	kidney failure	0.00778097	0.087841
DOID:120	female reproductive organ cancer	DOID:331	central nervous system disease	0.0077774	0.0878259
DOID:9540	vascular skin disease	DOID:10763	hypertension	0.00777568	0.0877935
DOID:331	central nervous system disease	DOID:5844	myocardial infarction	0.00777088	0.0877914
DOID:9351	diabetes mellitus	DOID:5614	eye disease	0.00776883	0.0877629
DOID:3342	bone inflammation disease	DOID:37	skin disease	0.00776782	0.0877256
DOID:9074	systemic lupus erythematosus	DOID:4961	bone marrow disease	0.00776319	0.0877188
DOID:3620	central nervous system cancer	DOID:9119	acute myeloid leukemia	0.00775984	0.0877016
DOID:1247	blood coagulation disease	DOID:331	central nervous system disease	0.00775073	0.0877369
DOID:615	leukopenia	DOID:2452	thrombophilia	0.00775009	0.0876949
DOID:229	female reproductive system disease	DOID:10763	hypertension	0.00774519	0.0876919
DOID:1168	familial hyperlipidemia	DOID:1387	hypolipoproteinemia	0.00773889	0.0877044
DOID:178	vascular disease	DOID:3083	chronic obstructive pulmonary disease	0.00773063	0.087731
DOID:2394	ovarian cancer	DOID:3620	central nervous system cancer	0.00772786	0.0877053
DOID:3119	gastrointestinal system cancer	DOID:850	lung disease	0.00771598	0.0877571
DOID:12365	malaria	DOID:526	Human immunodeficiency virus infectious disease	0.00771512	0.0877164
DOID:3393	coronary heart disease	DOID:11984	hypertrophic cardiomyopathy	0.00770692	0.0877375
DOID:3119	gastrointestinal system cancer	DOID:680	tauopathy	0.00770691	0.0876903
DOID:3394	ischemic heart disease	DOID:4079	heart valve disease	0.00770302	0.0876905
DOID:9970	obesity	DOID:182	calcinosis	0.00770009	0.0876719
DOID:3755	antithrombin III deficiency	DOID:3756	protein C deficiency	0.00769886	0.0876393
DOID:1307	dementia	DOID:178	vascular disease	0.00769155	0.0876577
DOID:679	basal ganglia disease	DOID:3407	carotid artery disease	0.00768866	0.0876381
DOID:3119	gastrointestinal system cancer	DOID:10652	Alzheimer's disease	0.00768812	0.0875975
DOID:14262	oral candidiasis	DOID:13166	allergic bronchopulmonary aspergillosis	0.00768638	0.0875651
DOID:9500	leukocyte disease	DOID:2218	blood platelet disease	0.00768505	0.0875305
DOID:3328	temporal lobe epilepsy	DOID:11832	visual epilepsy	0.00767662	0.0875586
DOID:2868	arterial occlusive disease	DOID:2320	obstructive lung disease	0.00767077	0.0875733
DOID:1749	squamous cell carcinoma	DOID:171	neuroectodermal tumor	0.0076702	0.0875339
DOID:5082	liver cirrhosis	DOID:4029	gastritis	0.00766481	0.0875347
DOID:0080001	bone disease	DOID:5093	thoracic cancer	0.00766408	0.0874949
DOID:1176	bronchial disease	DOID:557	kidney disease	0.00765069	0.0875715
DOID:417	hypersensitivity reaction type II disease	DOID:2349	arteriosclerosis	0.00764152	0.0876037
DOID:13089	intracranial arterial disease	DOID:10763	hypertension	0.00763603	0.0876087
DOID:1273	respiratory syncytial virus infectious disease	DOID:1883	hepatitis C	0.00763294	0.0875887
DOID:0080001	bone disease	DOID:1612	breast cancer	0.00762562	0.0876113
DOID:2055	post-traumatic stress disorder	DOID:594	panic disorder	0.0076199	0.0876147
DOID:0050589	inflammatory bowel disease	DOID:178	vascular disease	0.0076167	0.0876005
DOID:3394	ischemic heart disease	DOID:865	vasculitis	0.00760681	0.0876438
DOID:4194	glucose metabolism disease	DOID:848	arthritis	0.00760254	0.087636
DOID:3363	coronary arteriosclerosis	DOID:4079	heart valve disease	0.00759141	0.0876914
DOID:5295	intestinal disease	DOID:557	kidney disease	0.00758949	0.0876561
DOID:74	hematopoietic system disease	DOID:37	skin disease	0.0075857	0.087643
DOID:848	arthritis	DOID:74	hematopoietic system disease	0.00758155	0.0876315
DOID:936	brain disease	DOID:7148	rheumatoid arthritis	0.00757491	0.087638
DOID:9538	multiple myeloma	DOID:5093	thoracic cancer	0.00757167	0.0876208
DOID:178	vascular disease	DOID:3213	demyelinating disease	0.00756121	0.0876734
DOID:2320	obstructive lung disease	DOID:3393	coronary heart disease	0.0075569	0.0876688
DOID:2376	chronic progressive multiple sclerosis	DOID:2377	multiple sclerosis	0.00755568	0.0876367
DOID:9538	multiple myeloma	DOID:1612	breast cancer	0.00755069	0.0876364
DOID:850	lung disease	DOID:7148	rheumatoid arthritis	0.0075336	0.0877316
DOID:9351	diabetes mellitus	DOID:848	arthritis	0.00753245	0.0876969
DOID:2349	arteriosclerosis	DOID:2320	obstructive lung disease	0.00752463	0.0877119
DOID:9741	biliary tract disease	DOID:0050589	inflammatory bowel disease	0.0075132	0.0877832
DOID:1289	neurodegenerative disease	DOID:9074	systemic lupus erythematosus	0.00751292	0.0877406
DOID:8692	myeloid leukemia	DOID:1749	squamous cell carcinoma	0.00750953	0.0877302
DOID:2320	obstructive lung disease	DOID:9675	pulmonary emphysema	0.00750137	0.0877588
DOID:2841	asthma	DOID:557	kidney disease	0.00749994	0.0877295
DOID:1080	filariasis	DOID:2789	parasitic protozoa infectious disease	0.0074986	0.0876949
DOID:437	myasthenia gravis	DOID:9884	muscular dystrophy	0.00749624	0.0876651
DOID:1749	squamous cell carcinoma	DOID:0060058	lymphoma	0.00749452	0.0876353
DOID:2871	endometrial carcinoma	DOID:3119	gastrointestinal system cancer	0.00749052	0.0876308
DOID:1470	major depressive disorder	DOID:9478	postpartum depression	0.00748662	0.087621
DOID:12132	Wegener's granulomatosis	DOID:3049	Churg-Strauss syndrome	0.00748209	0.0876107
DOID:4138	bile duct disease	DOID:0050589	inflammatory bowel disease	0.00746245	0.0877446
DOID:178	vascular disease	DOID:526	Human immunodeficiency virus infectious disease	0.00745514	0.0877568
DOID:0050589	inflammatory bowel disease	DOID:4029	gastritis	0.00744988	0.0877596
DOID:13241	Behcet's disease	DOID:1205	hypersensitivity reaction type I disease	0.00744884	0.0877204
DOID:331	central nervous system disease	DOID:3454	brain infarction	0.0074323	0.0878289
DOID:10459	common cold	DOID:4481	allergic rhinitis	0.00743118	0.0877918
DOID:8538	reticulosarcoma	DOID:3093	nervous system cancer	0.00742591	0.0877893
DOID:4481	allergic rhinitis	DOID:3083	chronic obstructive pulmonary disease	0.00742244	0.0877774
DOID:14330	Parkinson's disease	DOID:3407	carotid artery disease	0.00740897	0.0878538
DOID:8955	sideroblastic anemia	DOID:4961	bone marrow disease	0.00740461	0.0878544
DOID:1168	familial hyperlipidemia	DOID:9452	fatty liver disease	0.00740277	0.0878252
DOID:229	female reproductive system disease	DOID:121	vaginal disease	0.00739858	0.0878154
DOID:1555	urticaria	DOID:37	skin disease	0.00739551	0.0877999
DOID:780	placenta disease	DOID:47	prostate disease	0.00738822	0.0878344
DOID:417	hypersensitivity reaction type II disease	DOID:3119	gastrointestinal system cancer	0.00738602	0.0878152
DOID:1936	atherosclerosis	DOID:417	hypersensitivity reaction type II disease	0.00736681	0.0879344
DOID:0080001	bone disease	DOID:2531	hematologic cancer	0.00735792	0.0879683
DOID:3401	inappropriate ADH syndrome	DOID:53	pituitary gland disease	0.00735294	0.0879714
DOID:409	liver disease	DOID:14268	sclerosing cholangitis	0.0073503	0.0879517
DOID:0050589	inflammatory bowel disease	DOID:1289	neurodegenerative disease	0.00734367	0.0879626
DOID:229	female reproductive system disease	DOID:680	tauopathy	0.00734122	0.0879434
DOID:3527	cerebral arterial disease	DOID:10763	hypertension	0.00733975	0.0879092
DOID:106	pleural tuberculosis	DOID:2957	pulmonary tuberculosis	0.00733717	0.087887
DOID:2868	arterial occlusive disease	DOID:13089	intracranial arterial disease	0.00733672	0.0878456
DOID:229	female reproductive system disease	DOID:10652	Alzheimer's disease	0.00733102	0.0878483
DOID:13641	exfoliation syndrome	DOID:9282	ocular hypertension	0.00732832	0.0878287
DOID:120	female reproductive organ cancer	DOID:4960	bone marrow cancer	0.00732745	0.0877884
DOID:11476	osteoporosis	DOID:114	heart disease	0.00732351	0.0877818
DOID:2377	multiple sclerosis	DOID:178	vascular disease	0.00731386	0.0878372
DOID:8692	myeloid leukemia	DOID:715	T-cell leukemia	0.00731108	0.0878151
DOID:1459	hypothyroidism	DOID:7997	thyrotoxicosis	0.0073073	0.0878121
DOID:114	heart disease	DOID:3454	brain infarction	0.00730338	0.0878003
DOID:2376	chronic progressive multiple sclerosis	DOID:3213	demyelinating disease	0.00729727	0.0878138
DOID:11054	urinary bladder cancer	DOID:9119	acute myeloid leukemia	0.00729279	0.0878093
DOID:0050589	inflammatory bowel disease	DOID:12236	primary biliary cirrhosis	0.00728818	0.0878068
DOID:936	brain disease	DOID:1176	bronchial disease	0.00728799	0.0877626
DOID:3128	anus disease	DOID:1285	rectal disease	0.0072873	0.0877236
DOID:2403	aneurysm disease	DOID:326	ischemia	0.00728602	0.0876914
DOID:3342	bone inflammation disease	DOID:5614	eye disease	0.00728163	0.0876889
DOID:178	vascular disease	DOID:9074	systemic lupus erythematosus	0.0072687	0.0877708
DOID:7188	autoimmune thyroiditis	DOID:26	pancreas disease	0.00726254	0.0877827
DOID:2394	ovarian cancer	DOID:8538	reticulosarcoma	0.0072612	0.0877459
DOID:1936	atherosclerosis	DOID:2320	obstructive lung disease	0.00724926	0.0878061
DOID:12140	Chagas disease	DOID:9146	visceral leishmaniasis	0.00724751	0.0877759
DOID:11054	urinary bladder cancer	DOID:8538	reticulosarcoma	0.00724521	0.0877524
DOID:3093	nervous system cancer	DOID:6039	intraocular melanoma	0.00724337	0.0877234
DOID:5093	thoracic cancer	DOID:557	kidney disease	0.00724259	0.0876866
DOID:2349	arteriosclerosis	DOID:13089	intracranial arterial disease	0.00722772	0.0877753
DOID:1612	breast cancer	DOID:557	kidney disease	0.00722135	0.0877857
DOID:12176	goiter	DOID:1459	hypothyroidism	0.00721935	0.0877628
DOID:1289	neurodegenerative disease	DOID:319	spinal cord disease	0.00720694	0.087837
DOID:12554	hemolytic-uremic syndrome	DOID:12449	aplastic anemia	0.007203	0.0878315
DOID:865	vasculitis	DOID:341	peripheral vascular disease	0.0071956	0.0878657
DOID:1339	Diamond-Blackfan anemia	DOID:4961	bone marrow disease	0.00718747	0.0879056
DOID:3394	ischemic heart disease	DOID:11984	hypertrophic cardiomyopathy	0.0071721	0.0880117
DOID:9182	pemphigus	DOID:37	skin disease	0.00716744	0.0880107
DOID:216	dental caries	DOID:3388	periodontal disease	0.00716563	0.0879791
DOID:2841	asthma	DOID:936	brain disease	0.00716444	0.087943
DOID:3620	central nervous system cancer	DOID:0060058	lymphoma	0.00716046	0.0879415
DOID:848	arthritis	DOID:37	skin disease	0.00715828	0.0879181
DOID:11476	osteoporosis	DOID:680	tauopathy	0.00715731	0.0878876
DOID:3620	central nervous system cancer	DOID:170	endocrine gland cancer	0.00715398	0.0878669
DOID:2355	anemia	DOID:12987	agranulocytosis	0.00715291	0.0878299
DOID:10652	Alzheimer's disease	DOID:11476	osteoporosis	0.00714975	0.0878162
DOID:331	central nervous system disease	DOID:2742	auditory system disease	0.00714945	0.0877747
DOID:3393	coronary heart disease	DOID:4194	glucose metabolism disease	0.00714587	0.0877677
DOID:409	liver disease	DOID:680	tauopathy	0.0071402	0.0877886
DOID:5093	thoracic cancer	DOID:114	heart disease	0.00713856	0.0877589
DOID:83	cataract	DOID:5679	retinal disease	0.00713501	0.0877484
DOID:10608	celiac disease	DOID:2452	thrombophilia	0.00713456	0.0877075
DOID:409	liver disease	DOID:10652	Alzheimer's disease	0.00713131	0.0876925
DOID:2394	ovarian cancer	DOID:3908	non-small cell lung carcinoma	0.00712126	0.0877422
DOID:2868	arterial occlusive disease	DOID:3527	cerebral arterial disease	0.00711989	0.0877059
DOID:114	heart disease	DOID:1612	breast cancer	0.00711068	0.08775
DOID:12236	primary biliary cirrhosis	DOID:14018	alcoholic liver cirrhosis	0.00710823	0.0877264
DOID:8577	ulcerative colitis	DOID:2044	drug-induced hepatitis	0.00710665	0.0876968
DOID:229	female reproductive system disease	DOID:417	hypersensitivity reaction type II disease	0.00709957	0.0877201
DOID:14069	cerebral malaria	DOID:9146	visceral leishmaniasis	0.00709738	0.0876925
DOID:0001816	angiosarcoma	DOID:4233	clear cell sarcoma	0.00708197	0.0877995
DOID:3363	coronary arteriosclerosis	DOID:13241	Behcet's disease	0.00707972	0.0877754
DOID:7998	hyperthyroidism	DOID:12466	secondary hyperparathyroidism	0.00707253	0.0878027
DOID:5295	intestinal disease	DOID:936	brain disease	0.00704806	0.087997
DOID:2868	arterial occlusive disease	DOID:4194	glucose metabolism disease	0.00704806	0.0879527
DOID:9351	diabetes mellitus	DOID:3393	coronary heart disease	0.00703887	0.0880075
DOID:5082	liver cirrhosis	DOID:178	vascular disease	0.00703658	0.08799
DOID:1826	epilepsy syndrome	DOID:3407	carotid artery disease	0.00702378	0.0880688
DOID:106	pleural tuberculosis	DOID:1639	skeletal tuberculosis	0.00701426	0.0881179
DOID:4194	glucose metabolism disease	DOID:37	skin disease	0.00701386	0.0880767
DOID:2349	arteriosclerosis	DOID:3527	cerebral arterial disease	0.00701315	0.0880406
DOID:12894	Sjogren's syndrome	DOID:9074	systemic lupus erythematosus	0.00700624	0.0880676
DOID:850	lung disease	DOID:5295	intestinal disease	0.00700479	0.0880366
DOID:1240	leukemia	DOID:1289	neurodegenerative disease	0.00700083	0.0880215
DOID:1074	kidney failure	DOID:3119	gastrointestinal system cancer	0.00699889	0.087994
[truncated: 4,982 more rows]
